1  
2  
3  
4  
5  
6  
7  
8  
9  
10  
11  
12  
13  
14  
15  
16  
17  
18  
19  
20  
21  
22  
23  
24  
25  
26  
27  
28  
29  
30  
31  
32  
33  
34  
35  
36  
37  
38  
39  
40  
41  
42  
43  
44  
45  
46  
47  
48  
49  
50  
51  
52

## Calretinin and calbindin architecture of the midline thalamus associated with prefrontal-hippocampal circuitry

Abbreviated Title: CALCIUM BINDING PROTEINS IN MIDLINE THALAMUS

Tatiana D. Viena<sup>1</sup>, Gabriela E. Rasch<sup>1</sup>, Daniela Silva<sup>1</sup>, Timothy A. Allen<sup>1,2\*</sup>

<sup>1</sup>Cognitive Neuroscience Program, Department of Psychology, Florida International University, Miami, FL, 33199, USA

<sup>2</sup>Department of Environmental Health Sciences, Robert Stempel College of Public Health, Florida International University, Miami, FL, 33199, USA

Keywords: calretinin, calbindin, parvalbumin, nucleus reuniens, paratenial, rhomboid, paraventricular nucleus

Number of figures: 7

Number of tables: 0

Number of text pages: 46

Number of supplemental figures: 1

Number of supplemental tables: 2

Total character count (with spaces):

Title: 110

Abstract: 2057

Introduction: 6801

Results: 23,008

Discussion: 11,447

Acknowledgement: 388

Author Contributions: 181

Figure Captions: 11,034

Total: 55,025

Corresponding Author:

Timothy A. Allen, PhD  
Department of Psychology  
Florida International University  
11200 SW 8<sup>th</sup> Street  
Miami, FL, 33199  
email: [tallen@fiu.edu](mailto:tallen@fiu.edu)  
Website: <http://allenlab.fiu.edu/>  
Twitter: @AllenNeuroLab

Conflicts of Interest: None.

53  
54  
55  
56  
57  
58  
59  
60  
61  
62  
63  
64  
65  
66

### **Authors Contributions**

TDV and TAA designed experiments; TDV, GER, and DS performed research; TDV drafted the manuscript; TDV and GER analyzed the results; and TDV, GER, DS, and TAA edited the manuscript.

### **Acknowledgements**

The authors would like to thank Amanda Pacheco-Spiewak and Nashya Linares for their assistance in cell counting; Maanasa Jayachandran and Maximilian Schlecht for experimental assistance; and Jennifer Dzedzic and Tomás Guilarte for help with microscopy. This work was supported, in part, by NIH grant MH113626 to TAA, and funds from the FIU CASE Distinguished Postdoctoral Program to TDV.

67 **ABSTRACT**

68 The midline thalamus bi-directionally connects the medial prefrontal cortex (mPFC) and hippocampus  
69 (HC) creating a unique cortico-thalamo-cortico circuit fundamental to memory and executive function.  
70 While the anatomical connectivity of midline thalamus has been thoroughly investigated, little is known  
71 about its cellular organization within each nucleus. Here we used immunohistological techniques to  
72 examine cellular distributions in the midline thalamus based on the calcium binding proteins parvalbumin  
73 (PV), calretinin (CR), and calbindin (CB). We also examined these calcium binding proteins in a  
74 population of reunitens cells known to project to both mPFC and HC using a dual fluorescence retrograde  
75 adenoassociated virus (AAV) based tracing approach. These dual reunitens mPFC-HC projecting cells, in  
76 particular, are thought to be important for synchronizing mPFC and HC activity. First, we confirmed the  
77 absence of PV<sup>+</sup> neurons in the midline thalamus. Second, we found a common pattern of CR<sup>+</sup> and CB<sup>+</sup>  
78 cells throughout midline thalamus with CR<sup>+</sup> cells running along the nearby third ventricle (3V) and  
79 penetrating the midline. CB<sup>+</sup> cells were consistently more lateral and toward the middle of the dorsal-  
80 ventral extent of the midline thalamus. Notably, single-labeled CR<sup>+</sup> and CB<sup>+</sup> zones were partially  
81 overlapping and included dual-labeled CR<sup>+</sup>/CB<sup>+</sup> cells. Within RE, we also observed a CR and CB subzone  
82 specific diversity. Interestingly, dual mPFC-HC projecting neurons in RE expressed none of the calcium  
83 binding proteins examined, but were contained in nests of CR<sup>+</sup> and CB<sup>+</sup> cells. Overall, the midline  
84 thalamus was well organized into CR<sup>+</sup> and CB<sup>+</sup> rich zones distributed throughout the region, with dual  
85 mPFC-HC projecting cells in reunitens representing a unique cell population. These results provide a  
86 cytoarchitectural organization in the midline thalamus based on calcium binding protein expression, and  
87 sets the stage for future cell-type specific interrogations of the functional role of these different cell  
88 populations in mPFC-HC interactions.

89

90 **INTRODUCTION**

91 Interactions between the rodent agranular medial prefrontal cortex (mPFC) and the hippocampus  
92 (HC) are essential to cognition and adaptive behavior, especially the flexible use and consolidation of  
93 memory (Churchwell & Kesner, 2011; Eichenbaum, 2017; Jin & Maren, 2015; McGaugh et al., 2019;  
94 Preston & Eichenbaum, 2013). Theoretically, mPFC-HC dysfunction is a common root cause of various  
95 often overlapping neurocognitive symptoms that define several mental health disorders including  
96 Alzheimer's disease (Braak & Braak, 1991), schizophrenia (Lisman et al., 2010), epilepsy (Gelinas et al.,  
97 2016), and others. Anatomically, mPFC-HC interactions occur through multiple circuits including direct  
98 ventral HC → mPFC projections (Cenquizca & Swanson, 2007; Ferino et al., 1987; Skelin et al., 2019;  
99 Spellman et al., 2015); indirect cortico-cortico pathways via entorhinal (Burwell, 2000; Kerr et al., 2007;  
100 Witter et al., 2017), perirhinal cortex (Furtak et al., 2007; Jayachandran et al., 2019) and retrosplenial  
101 cortex (Hunsaker & Kesner, 2018; Nelson et al., 2014); and through midline thalamo-cortical connections  
102 (Hoover & Vertes, 2012; Vertes et al., 2007, 2015). In this regard, the midline thalamus is unique in that it  
103 serves a fundamental role in creating the canonical higher-order cortico-thalamo-cortico circuitry that  
104 unites mPFC with the HC (Sherman, 2017; Dolleman-van der Weel et al., 2019).

105 Major subdivisions of the midline thalamus include the dorsally situated paraventricular (PVT) and  
106 parataenial (PT) nuclei, and the ventrally situated rhomboid (RH) and reuniens (RE). Each region has  
107 unique connectivity patterns with mPFC, the HC, entorhinal and perirhinal cortex and septum, and  
108 including special dual mPFC-HC projecting neurons (Su & Bentivoglio, 1990; Varela et al., 2014; Vertes et  
109 al., 2006; Vertes & Hoover, 2008). Specific anatomical connectivity patterns have been the primary  
110 contributor in understanding and predicting subregional differences (Dolleman-van der Weel & Witter,  
111 1996; Vertes et al., 2006, 2015). For example, PVT has more connectivity with the amygdala (Li &  
112 Kirouac, 2008; Su & Bentivoglio, 1990) and been related to adaptive fear memory (Choi & McNally, 2017;  
113 Penzo et al., 2015). While RE, the most studied region, contains numerous cells with bidirectional  
114 monosynaptic projections to CA1 and mPFC (Hoover & Vertes, 2012; Varela et al., 2014), and thus been  
115 related to memory consolidation (Barker & Warburton, 2018; Dolleman-van der Weel et al., 2019; Varela

116 et al., 2014), top-down memory functions (Ito et al., 2015; Jayachandran et al., 2019; Viena et al., 2018;  
117 Xu & Sudhof, 2013), and mPFC-HC synchrony (Ferraris et al., 2018; Hallock et al., 2016; Hauer et al.,  
118 2019; Roy et al., 2017)

119 Little is known about the organization of cell types in the midline thalamus. Recently, Lara-  
120 Vasquez et al. (2016) identified two populations of midline thalamic cells that were differentiated by their  
121 calcium binding protein expression, notably and calretinin (CR) and calbindin (CB). Calcium binding  
122 proteins regulate several extra- and intra-cellular functions such as cell-cell communication, cell  
123 contracture, and signal transduction by triggering or buffering calcium signaling and compartmental  
124 concentrations (Arai et al., 1994; Celio, 1990; del Río & DeFelipe, 1996; Fonseca & Soriano, 1995;  
125 Sloviter, 1989; Zimmer et al., 1995). Lara-Vazquez et al. (2016) went on to show that the *in vivo* activity of  
126 midline thalamic neurons were determined, in part, by their calcium binding protein expression.  
127 Specifically, they showed that (during urethane anesthesia) midline thalamic CR<sup>+</sup> cells fired at low rates,  
128 did not increase their activity during HC theta, and were inhibited during HC sharp-wave ripples.  
129 Conversely, CR<sup>-</sup> cells fired faster and responded to HC theta.

130 In the rat brain, the anatomical distribution of calcium binding proteins, including parvalbumin (PV),  
131 CR and CB, differ widely across brain regions. For example, in the neocortex, PV positive (PV<sup>+</sup>) and CB<sup>+</sup>  
132 neurons are found throughout layers II-V, while CR positive (CR<sup>+</sup>) cells are mainly found in superficial  
133 cortical layers (Condé et al., 1994; DeFelipe, 1997; Hof et al., 1999; Reynolds et al., 2004; Sloviter, 1989).  
134 In the HC, PV<sup>+</sup> neurons can be found in restricted layers and neuronal types in CA1 and CA3 such as  
135 non-pyramidal basket and axo-axonic cells, while CB<sup>+</sup> cells are localized in CA1 and CA2 (Kosaka et al.,  
136 1988; Aika et al., 1994; Fonseca and Soriano, 1995; Fuchs et al., 2007), and CR<sup>+</sup> neurons preferentially  
137 stain interneurons in CA1 (Miettinen et al., 1992; del Río and DeFelipe, 1996; Gulyás et al., 1996; Urbán  
138 et al., 2002). In the thalamus, calcium binding protein distributions appear highly specific across nuclei.  
139 Early studies showed that the midline thalamus labels particularly strongly for CR and CB, but not PV  
140 (Arai et al., 1994; Winsky et al., 1992). However, regional and sub-regional distributions of these calcium  
141 binding proteins in the midline thalamus have not been explored in detail.

142 Specifying the expression and topography of calcium binding proteins in midline thalamus will  
143 provide novel insights into structure and provide opportunities for cell-type specific targeting. Here, we  
144 used immunohistological techniques to label and analyze details of the distribution PV, CR and CB  
145 throughout the midline thalamus. We also targeted calcium binding protein expression specifically in  
146 populations of RE cells that project to both mPFC and HC using dual retrograde viral tracers, in  
147 combination with immunohistochemistry. Our results first confirmed the absence of PV<sup>+</sup> cells throughout  
148 the midline thalamus. Second, we showed that there are distinct functional zones in midline thalamus  
149 defined by the topography of CR<sup>+</sup> and CB<sup>+</sup> labeling. Notably, we observed that the pattern of CR<sup>+</sup> and CB<sup>+</sup>  
150 zones were well matched between dorsal midline thalamus (PVT and PT) and ventral midline thalamus  
151 (RH and RE), only they were inverted relative to each other reflecting their wrapping around with the third  
152 ventricle (3V). CR<sup>+</sup> zones were most dense medial-laterally against the dorsal or ventral 3V walls and ran  
153 dorso-ventrally, or ventro-medially, along the midline away from their respective 3V. CB<sup>+</sup> cells were  
154 clustered more ventro- or dorso-laterally (for dorsal and ventral midline thalamus, respectively). CR<sup>+</sup> and  
155 CB<sup>+</sup> zones also overlapped and contained dual-labeled CR<sup>+</sup>/CB<sup>+</sup> cells. Lastly, we show that dual mPFC-  
156 HC projecting cells in RE expressed none of the three calcium binding proteins examined (PV, CR, and  
157 CB) but were surrounded by dense nests of CR<sup>+</sup> and CB<sup>+</sup> cells. We discuss these results with respect to  
158 the mPFC-HC circuitry, and the implications of future functional interrogations of the midline thalamus.

159

160

## MATERIALS AND METHODS

161

### ***Animal care and use***

162

163

164

165

166

167

All procedures described were conducted in compliance with Florida International University (FIU) Institutional Animal Care and Use Committee (IACUC) and Institutional Biosafety Committee (IBC). Brain tissue sections (40- $\mu$ m thick) from a total of 16 Long Evans rats (14 males, 2 females; Charles River; 250-350g on arrival) were used in these experiments. Rats were housed individually in a 12 hours inverse light/dark cycle (lights off at 10 a.m.) and had ad libitum access to food and water.

### ***Retrograde tracer injections***

168 A subsample of rats (n = 4, 2 males and 2 females) received bilateral retrograde AAV-CAG-  
169 TdTomato (59462-AAV<sub>rg</sub>; Addgene, MA) in mPFC (PL/IL) at the following DV coordinates: -5.0mm (50nL),  
170 -4.4mm (150 nL), and -3.8mm (200 nL), and AAV-CAG-GFP (Addgene, MA; 37825-AAV<sub>rg</sub>) targeting vCA1  
171 at -7.2 mm (100 nL), 6.8 mm (200 nL), and 6.2 mm (200 nL). Retrograde viral vector expression post  
172 injections was between 6-8 weeks before animals were sacrificed. Thalamic brain tissue sections from  
173 these rats further underwent 3,3'-diaminobenzidine (DAB) reactions of CR or CB (see below) prior to  
174 image visualization and captures using an Olympus BX41 brightfield/epifluorescence microscope.

### 175 ***Immunohistochemical tissue processing***

176 Naïve and experimental rats were deeply anesthetized and transcardially perfused with 100 mL of  
177 heparin saline at a speed of 10mL/minute, followed by 250 mL of 4% paraformaldehyde (PFA, pH 7.4) at  
178 the same perfusion speed. Post perfusion, brains were removed, preserved in 4% PFA for 24 hours and  
179 then cryoprotected in 30% sucrose solution until they sank to the bottom. Subsequently, fixated brains  
180 were frozen and cut into coronal sections using a cryostat (Leica CM 3050S) or a sliding microtome.

181 All tissue sections were cleaned with 1% sodium-borohydride in 0.1 M PB (pH 7.4), blocked for 1  
182 hour in 0.5% Bovine Serum Album (BSA) and then processed using the following procedures:

### 183 ***Parvalbumin fluorescence reactions***

184 A set of thalamic brain sections from 4 male rats was incubated at room temperature for 48 hours  
185 in parvalbumin (PV) primary antibody (1:250, MCA-3C9; Encore Bio, FL). After washes, tissue was  
186 incubated for 5 hours at room temperature in VectaFluor DyLight 594 anti-mouse secondary antibody (3  
187 drops in 5mL of 0.1% BSA, DK-8818; Vector Labs, CA). When incubation was completed, tissue was  
188 washed in 0.1 M PB (3 x 5 minutes) then mounted on gelatin coated slides and coverslipped with  
189 VectaShield mounting medium with DAPI for visualization.

### 190 ***Calretinin and calbindin dual fluorescence reactions***

191 Thalamic brain tissue sections from 5 male rats were incubated for 48 hours at room temperature  
192 in mouse CB primary antibody (1:500, MCA-5A9; Encore Bio, FL) and 24 hours in rabbit CR primary  
193 antibody (1: 2000, RPCA-Calret; Encore Bio, FL). After washes (3 x 5 minutes), sections were incubated

194 in secondary antibodies Alexa Flour 488 (anti-mouse, 1:1000) for 6 hours and Alexa Flour 594 (anti-  
195 rabbit, 1:1000) for 3 hours at room temperature. Post incubation, sections underwent PB washes and  
196 then, sections were treated with Vector TrueVIEW Autofluorescence kit (SP-8400; Vector Labs, CA; 3  
197 cases) for 2 minutes at room temperature to remove any background from aldehydes. After this step,  
198 tissue was washed 3 times with PB and subsequently, mounted in gelatin coated slides and coverslipped  
199 with VectaShield mounting medium with DAPI.

### 200 ***Calretinin (CR<sup>+</sup>) and calbindin (CB<sup>+</sup>) DAB reactions***

201 Brain sections that included midline thalamus were incubated for 48 hours at room temperature in  
202 rabbit calretinin (CR) primary antibody (1:2000, RPCA-Calret; Encore Bio, FL) OR mouse calbindin (CB)  
203 primary antibody (1:500, MCA-5A9; Encore Bio, FL) in 5mL of 0.1% BSA. After this period, tissue was  
204 washed 3 times for 5 minutes in 0.1 M PB and placed in goat anti-rabbit OR anti-mouse biotinylated  
205 secondary antibodies respectively (1:500, BP-9200/9100; Vector Labs, CA) for 6 hours. After PB washes,  
206 the tissue was reacted in a solution containing avidin–biotin complex (Vectastain Elite ABC Kit, PK-6100;  
207 Vector Laboratories, CA) for one hour at room temperature, followed by three 5-minute rinses in 0.1 M  
208 PB. The peroxidase reaction was produced by incubating the sections for 5 to 12 minutes in a DAB  
209 substrate solution (SK-4100; Vector Labs, CA). Reacted tissue was then mounted on gelatin coated  
210 slides, dehydrated in methanol and xylene before being cover-slipped with Permount or Vectashield  
211 antifade mounting medium with DAPI (H-1900, Vector Labs, CA).

### 212 ***Imaging and data analysis***

213 For each subject, sections were imaged at different rostro-caudal levels of midline thalamus ( $\beta$   
214 range -1.08/-3.0). Cases with similar rostral, mid and caudal levels were grouped together for cell  
215 quantification across reactions, nuclei and levels. Schematic drawings (overlays) from Swanson Rat Brain  
216 Atlas (2018) were used to define the boundaries of the thalamic nuclei. The regions were quantified  
217 automatically (see below) to identify immunoreacted cell bodies at each of the selected brain levels. Atlas  
218 overlays were placed on top of original captures using Adobe Illustrator® (Adobe Systems Inc., San



219 Jose, CA). Cell quantification was done on one hemisphere based on overall quality to avoid intrinsic  
220 confounds such as large blood vessels that might be present in any one section.

221 Immunofluorescence from PV<sup>+</sup>, CB<sup>+</sup> and CR<sup>+</sup> tissue, and retrogradely labeled RE neurons from  
222 mPFC and HC injections, was imaged using an Olympus FV1200 confocal microscope at 10X, 20X and  
223 60X focusing on midline thalamic structures (PVT, PT, RH and RE) using standard filter cubes for red  
224 fluorescence (excitation 545nm, emission 605nm), green fluorescence (excitation 470nm, emission  
225 525nm) and DAPI (excitation 350nm, emission 460nm). Captures at 60X magnification (oil immersed)  
226 were obtained to further explore and verify cell body staining. DAB peroxidase stained sections were  
227 captured using an Olympus BX51 brightfield microscope at 20X magnification.

### 228 ***Automated cell counts***

229 Quantification of neurons in all thalamic regions of interest (ROI) was performed using a  
230 customized automated pipeline built in CellProfiler Software version 3.1.9 (cellprofiler.org) for objective  
231 cell counts. FIJI ImageJ (Version 2.0.0; NIH; Schindelin et al., 2012) was used for preprocessing. The  
232 data was extracted from CellProfiler using customized Python code through Anaconda Software (Version  
233 2-2.4.0). CellProfiler has been previously used and validated for both fluorescence and chromogenic  
234 localization by other research laboratories (McQuin et al., 2018; Tollemar et al., 2018). We further  
235 validated the accuracy of CellProfiler by comparing the counts from 26 ROIs between two experienced  
236 counters (manually) and CellProfiler. The counts from Experimenter 1 and Experimenter 2, and their  
237 combined average were significantly correlated with the results yielded by CellProfiler (CellProfiler v.  
238 Experimenter 1,  $r = .0.956$ ; CellProfiler v. Experimenter 2,  $r = 0.941$ ; CellProfiler v. Average,  $r = 0.958$ ; all  
239  $p < .001$ ). A test of inter-rater reliability showed a very high degree of reliability (Cronbach's  $\alpha = 9.78$ )  
240 between the counters total average and CellProfiler's results.

### 241 ***Fluorescence-based PV<sup>+</sup>, CR<sup>+</sup> and CB<sup>+</sup> cell counts (single/dual)***

242 A pipeline was created for the quantification of PV<sup>+</sup>, CB<sup>+</sup>, CR<sup>+</sup> or DAPI fluorescence-based cell  
243 counts. *CorrectIlluminationCalculate* and *CorrectIlluminationApply* functions from CellProfiler were applied  
244 onto separated RGB images in order to correct any uneven lighting artifacts and further reduce noise. The

245 three channels were aligned based on the signal intensity values using the CellProfiler *Align* function. A  
246 restricted range of diameters and a set of intensity values were determined for each channel allowing for  
247 proper cell identification. A mask of the identified cells was created for each RGB channel. Dual-labeled  
248 CR<sup>+</sup>/CB<sup>+</sup> cells were quantified by relating the masks to each other Using CellProfiler's *Relate Objects*  
249 function.

### 250 ***DAB CR<sup>+</sup> and CB<sup>+</sup> cell counts***

251 A separate CellProfiler pipeline was created to quantify the number of DAB stained CR<sup>+</sup> and CB<sup>+</sup>  
252 cells. ROIs were isolated from overlaid brightfield images using Adobe Photoshop®. Brightfield images  
253 were converted to a greyscale and inverted using the *ImageMath* function in CellProfiler. This process  
254 helps reduce noise, enhance cell features, and makes it easier to identify non-cells bodies artifacts, thus  
255 avoiding over-quantification. Quantification of cell bodies was determined with a set range of intensity and  
256 diameter values.

### 257 ***Counting RE neurons with collaterals to mPFC and HC***

258 We identified RE cell clusters that projected to both mPFC and HC with the FV1200 confocal  
259 microscope with using a z-stack (0.5 microns optical sections) to confirm dual-labeling. The same tissue  
260 was imaged with the Olympus BX41 brightfield-epifluorescence microscope for dual-fluorescence and  
261 DAB imaging similar to previous reports (Al-Mashhadi et al., 2015; Majercikova et al., 2012; Young et al.,  
262 2005). Individual captures were made at 20X magnification for the following channels: red (RE→mPFC),  
263 green (RE→HC), blue (DAPI) and brightfield (DAB CR<sup>+</sup> or DAB CB<sup>+</sup> cells). Captures were made in two  
264 prominent dorsal and ventral regions within a 545µm x 390µm area that contained the dual-projecting  
265 clusters in RE. The corresponding brightfield image of CR or CB was transposed onto the merged  
266 fluorescent image using Adobe Photoshop®. A separate layer was created to mark the location of CR<sup>+</sup>  
267 cells with white '+' signs and CB<sup>+</sup> cells with cyan '+' signs. The flattened image was used to verify whether  
268 there was an overlap between DAB CR<sup>+</sup> or DAB CB<sup>+</sup> cells with immunofluorescence reacted neurons.  
269 Here, counts were performed manually by two experienced experimenters and averaged. DAPI cell  
270 counts were done using a custom CellProfiler pipeline.

271 ***Cell soma (body) size***

272 Using CR and CB dual reacted immunofluorescence sections, we measured soma size ( $\mu\text{m}^2$ ) in  
273 PVT and RE using FIJI Image J. We sampled cells in a  $200\mu\text{m} \times 200\mu\text{m}$  region of PVT and RE. Counts  
274 were made in medial, dorsolateral, and ventrolateral subregions of each nuclei. Cell bodies were outlined  
275 with the freehand tool in FIJI and measured using a set calibration scale from the microscope.

276 ***Cell radius distance***

277 In merged fluorescent and brightfield images, the radial distance of CR<sup>+</sup> or CB<sup>+</sup> cells from a small  
278 sample of dual mPFC-HC cells in RE was measured by imposing a  $100\mu\text{m}$  radius circle centered on each  
279 individual dual labeled cell. Then, the distance from the center of dual labeled cells to all CR<sup>+</sup> or CB<sup>+</sup> cells  
280 within this area was measured using Image J.

281 ***Statistical analysis***

282 For dual reacted CB and CR immunofluorescence data, two-way repeated measures analysis of  
283 variance (ANOVAs) were performed to compare interaction or main effects of region (nuclei) and calcium  
284 binding protein expression type on cell area density across the rostro, medial and caudal levels, followed  
285 by one way-ANOVAs and multivariate/ pairwise comparisons (with Bonferroni correction) when the  
286 differences were statistically significant. For DAB reacted tissue, two-way ANOVAs were used to compare  
287 region (nuclei) and calcium binding protein expression type differences on cell area density. When  
288 significant, Bonferroni post hoc tests and pairwise comparisons followed. Effect size was performed using  
289 Hedges'd given the unequal sample sizes. Finally, a linear regression analysis was performed to assess  
290 the relationship between DAB cell counts and distance from dual projecting cells. All collected data was  
291 tallied and saved in Microsoft Excel and subsequently analyzed in SPSS (version 26). An alpha of 0.05  
292 was considered statistically significant for all analysis.

293 **RESULTS**

294 ***Absence of PV<sup>+</sup> cells in midline thalamus***

295 We first looked for evidence of PV<sup>+</sup> cell body labeling in the midline thalamus (PVT, PT, RE, and  
296 RH). We did not find PV<sup>+</sup> cell body labeling in any of the three rostral-caudal sections selected to span the

297 length of the midline thalamus (n = 4 rats, 12 coronal sections)(Fig. 1A-C). The lack of PV expression in  
298 midline thalamic cells stood in stark contrast to prominent PV<sup>+</sup> cell body labeling in other brain regions  
299 with well-established PV<sup>+</sup> cell populations including the thalamic reticular nucleus of the thalamus (TRN),  
300 the hippocampus, lateral and basolateral amygdala, striatum, and cortex (Fig. 1A, D-E). We also  
301 observed dense PV<sup>+</sup> fibers and puncta throughout much of the nearby lateral thalamus and striatum. In  
302 TRN, we saw uniformly dense populations of PV<sup>+</sup> cells with large immunonegative nuclei, which is  
303 characteristic of PV<sup>+</sup> labeling in TRN neurons (Fig 1D;(Arai et al., 1994; Celio, 1990; Csillik et al., 2005;  
304 Kirichenko et al., 2017). Likewise, the distribution of PV<sup>+</sup> cells in cortex was organized by layers and was  
305 comparatively more sparse (Fig 1E; also see Van Brederode et al., 1991; Ahn et al., 2017). Despite the  
306 absence of PV<sup>+</sup> cell bodies in the midline thalamus, parvalbumin labeling was still abundant in the form of  
307 PV<sup>+</sup> puncta that were most often clustered near or between cell bodies (Fig. 1B-C, insets). In some cases,  
308 PV<sup>+</sup> puncta were observed enveloping entire cell bodies. More commonly, PV<sup>+</sup> puncta formed  
309 asymmetrical cluster densities that were biased toward one pole and formed a rough spherical cap.  
310 Generally, the observations are in line with previous descriptions of PV<sup>+</sup> labeling in midline thalamus  
311 (Celio, 1990; Arai et al., 1994).

### 312 ***CR and CB expression in midline thalamus***

313 Next we examined CR<sup>+</sup> and CB<sup>+</sup> labeling in three rostral-caudal sections because of known  
314 differences along this axis of the midline thalamus (Arai et al., 1994; Celio, 1990; Rogers & Résibois,  
315 1992; Winsky et al., 1992). Each coronal section was immunofluorescence reacted for both CR and CB. A  
316 general finding was that CR<sup>+</sup> and CB<sup>+</sup> cell distributions show different clustering zones within and  
317 between PVT, PT, RE and RH. A clear overall pattern emerged in the CR<sup>+</sup> and CB<sup>+</sup> labeling that similarly  
318 organized the cytoarchitecture of the dorsal midline thalamus (PVT and PT) and ventral midline thalamus  
319 (RH and RE). That is, CR<sup>+</sup> zones were dense medial-laterally against the dorsal and ventral 3V and ran  
320 dorso-ventrally along the midline away from their respective 3V forming the shape of a “T” or “Y” in dorsal  
321 midline thalamus, or a similar inverted pattern in ventral midline thalamus. In relation to CR<sup>+</sup> cells, CB<sup>+</sup>  
322 cells were clustered more ventro- or dorso-laterally (for dorsal and ventral midline thalamus, respectively).

323 CR<sup>+</sup> and CB<sup>+</sup> zones partially overlapped and contained dual-labeled CR<sup>+</sup>/CB<sup>+</sup> cells. Although these CR<sup>+</sup>  
324 and CB<sup>+</sup> patterns were similar in dorsal and ventral midline thalamus, there was generally more  
325 complexity to this organization in ventral midline thalamus.

### 326 ***CR<sup>+</sup> and CB<sup>+</sup> labeling distributions in rostral midline thalamus***

327 In rostral sections ( $\beta$  -1.44; n = 4 rats), CR<sup>+</sup> cell and fibers densities were found in several regions  
328 including the hypothalamus, striatum, central and medial amygdala, medial divisions of thalamus, and  
329 cortex (Fig. 2A, magenta) notably including a very prominent CR<sup>+</sup> fiber band in the superficial layers of  
330 entorhinal cortex (Wouterlood et al., 2001). In the midline thalamus, CR<sup>+</sup> cells were predominantly located  
331 in the dorsal, medial and ventral portions (Fig. 2B & C, magenta). Whereas, CB<sup>+</sup> cells and fibers often  
332 expressed in the same regions as CR<sup>+</sup> cells, labeling was more prominent in the lateral portions of the  
333 thalamus, internal capsule, basolateral amygdala, and globus pallidus (Fig. 2A, green). In the midline  
334 thalamus, CB<sup>+</sup> cells chiefly labeled the lateral portions (Fig. 2B & C). Generally, we observed that CR<sup>+</sup>  
335 and CB<sup>+</sup> cell distributions organized into well-defined zones within the midline thalamus giving the  
336 impression that there are important calcium binding protein specific subregions within PVT, PT and RE.

### 337 ***Distinctive CR<sup>+</sup> and CB<sup>+</sup> labeling in rostral PVT and PT***

338 Next, we focused on CR<sup>+</sup> and CB<sup>+</sup> labeling in the dorsal midline thalamic nuclei (PVT and PT; Fig.  
339 2B). While PVT and PT are often considered together, their CR<sup>+</sup> and CB<sup>+</sup> cell distributions indicated that  
340 they contain different functional zones. In PVT, CR<sup>+</sup> cells were bright, large, and clustered together in a  
341 chain formation that ran dorsoventrally and hugged the lateral borders ( $M = 9.168$ ,  $SD = 1.146$ ; density in  
342 cells per 0.01mm<sup>2</sup>; Fig. 2B & D<sub>i</sub>). By contrast, few CR<sup>+</sup> cells were visible in dorsal and medial PVT,  
343 although these areas were heavily populated with CR<sup>+</sup> puncta. CB<sup>+</sup> cells stained much lighter, but  
344 exhibited similar topography within PVT ( $M = 5.928$ ,  $SD = 1.490$ ; density in cells per 0.01mm<sup>2</sup>; Fig. 2B &  
345 D<sub>ii</sub>). Dual-labeled CR<sup>+</sup> and CB<sup>+</sup> cells were most prominent in the lateral portions of PVT (Fig. 2C & D<sub>iii</sub>).  
346 These dual-labeled CR<sup>+</sup>/CB<sup>+</sup> cells accounted for 29.22% of CR<sup>+</sup> cells and 45.19% of CB<sup>+</sup> cells in PVT  
347 (Fig. 2F).

348 Different from PVT, PT had a clear segregation between CB<sup>+</sup> and CR<sup>+</sup> cell topographies (Fig. 2B).  
349 In PT, CR<sup>+</sup> cells ( $M = 3.600$ ,  $SD = 1.978$ ; density in cells per 0.01mm<sup>2</sup>) were practically absent from  
350 ventral PT but were abundant in dorsal PT. This CR<sup>+</sup> and CB<sup>+</sup> labeling delineates rostral PT into dorsal  
351 and ventral subregions (Fig 2B). CB<sup>+</sup> cells ( $M = 8.845$ ,  $SD = 4.847$ ; density in cells per 0.01mm<sup>2</sup>) were  
352 observed throughout PT, usually intermingled or overlapping with CR<sup>+</sup> cells in dorsal PT, or as an  
353 independent population in ventral PT. Dual-labeled CR<sup>+</sup>/CB<sup>+</sup> cells ( $M = 2.398$ ,  $SD = 2.086$ ; density in cells  
354 per 0.01mm<sup>2</sup>) were located in dorsal PT. CR<sup>+</sup>/CB<sup>+</sup> cells accounted for 66.67% of CR<sup>+</sup> cells and 27.12% of  
355 CB<sup>+</sup> cells in PT.

### 356 ***Rostral RE exhibits CR<sup>+</sup> and CB<sup>+</sup> defined zones***

357 In rostral sections, the ventral midline thalamus is composed entirely of RE, which showed  
358 distinctive patterns of CR<sup>+</sup> and CB<sup>+</sup> labeling (Fig. 2C). Rostral RE CR<sup>+</sup> cells were bright, large, and their  
359 intensity increased from dorsal to ventral borders ( $M = 7.990$ ,  $SD = 1.042$ ; density in cells per 0.01mm<sup>2</sup>).  
360 Generally, CR<sup>+</sup> cells in rostral RE were concentrated in dorsal, middle, and ventral regions and practically  
361 avoided lateral areas, with the exception of a few cells that dual-labeled with CB<sup>+</sup> cells (Fig. 2C & E). RE  
362 CB<sup>+</sup> cells ( $M = 11.383$ ,  $SD = 2.404$ ; density in cells per 0.01mm<sup>2</sup>) were present throughout the whole body  
363 of RE but were more densely packed and separated from CR<sup>+</sup> cells in dorsolateral regions. In dorsal and  
364 medial RE, CR<sup>+</sup> and CB<sup>+</sup> cells were loosely distributed throughout and cells were visibly smaller in size  
365 compared to cells in the dorsolateral regions (Fig. 2C, E<sub>i</sub>-E<sub>ii</sub>; Table S1). Patches of dual-labeled CR<sup>+</sup>/CB<sup>+</sup>  
366 cells ( $M = 4.365$ ,  $SD = 0.823$ ; density in cells per 0.01mm<sup>2</sup>) were common in dorsal, medial and ventral  
367 subdivisions of RE (Fig. 2C & E<sub>iii</sub>). These dual-labeled CR<sup>+</sup>/CB<sup>+</sup> cells accounted for 54.63% of CR<sup>+</sup> cells,  
368 and 38.35% of CB<sup>+</sup> cells in RE. A prominent region of CR<sup>+</sup>/CB<sup>+</sup> cells was located in the boundary between  
369 RE mid-ventral regions and RE lateral areas (Fig. 2C). We also noted there were visible circular bands of  
370 CR<sup>+</sup> and CB<sup>+</sup> cells that contained a sparsely labeled center (Fig. 2C, dotted circles), although DAPI  
371 indicated the presence of cells within these circles. These results show CR<sup>+</sup>, CB<sup>+</sup>, and CR<sup>+</sup>/CB<sup>+</sup> zones  
372 that easily delineate rostral RE.

373 ***PVT and RE show opposing CR<sup>+</sup>, CB<sup>+</sup> and CR<sup>+</sup>/CB<sup>+</sup> cell densities and cell size patterns in rostral***

374 ***RE***

375 Next we focused on comparing PVT and RE, the largest and most studied regions of midline  
376 thalamus, which are well known for their different functional roles (Cassel et al., 2013; Hsu et al., 2014;  
377 Kawano, 2001; Matzeu et al., 2014; Vertes et al., 2015). The overall CR<sup>+</sup> and CB<sup>+</sup> cell labeling patterns in  
378 rostral midline thalamus suggested clear differences between PVT and RE with more CR<sup>+</sup> cells in PVT  
379 and more CB<sup>+</sup> cells and dual-labeled CR<sup>+</sup>/CB<sup>+</sup> cells in RE. First, we compared CR<sup>+</sup> and CB<sup>+</sup> cell densities  
380 in PVT and RE. There was a significant effect of region ( $F_{(1,3)} = 32.773$ ,  $p = 0.011$ ) such that CB<sup>+</sup> cell  
381 density in RE was slightly more than PVT, but no main effect of cell densities by calcium binding protein  
382 expressed ( $F_{(1,3)} = 0.004$ ,  $p = 0.955$ ), and a significant interaction effect ( $F_{(1,3)} = 4.907$ ,  $p = 0.006$ ),  
383 indicating opposite calcium binding expression proportions between PVT and RE (Fig. 2F). There were  
384 also significantly higher densities of dual-labeled CR<sup>+</sup>/CB<sup>+</sup> cells in RE than PVT (1.63:1, RE:PVT; paired-  
385 samples  $t_{(3)} = 9.268$ ,  $p = 0.003$ ). A comparison of CR<sup>+</sup> and CB<sup>+</sup> cell sizes in PVT and RE (Fig. 2G) showed  
386 no significant main effect of cell size by calcium binding protein expressed ( $F_{(1,324)} = 0.467$ ,  $p = 0.495$ ) or  
387 region ( $F_{(1,324)} = 0.633$ ,  $p = 0.427$ ), but there was a significant interaction effect ( $F_{(1,324)} = 5.404$ ,  $p = 0.021$ ).  
388 In PVT, CR<sup>+</sup> cells tended to be larger compared to RE, and CB<sup>+</sup> cells were larger in RE compared to PVT  
389 (Fig. 2G). Further in PVT, cells were largest laterally and smallest medially. In RE, CB<sup>+</sup> cells were largest  
390 in dorsolateral subdivisions, but smaller in medial and ventrolateral divisions. Dual-labeled CR<sup>+</sup>/CB<sup>+</sup> cells  
391 in PVT and RE were not significantly different (paired-samples  $t_{(105)} = 0.411$ ,  $p = 0.523$ ). Detailed cell size  
392 measurements are provided in supplemental table S1.

393 **CR<sup>+</sup> and CB<sup>+</sup> labeling in mid-levels of the midline thalamus**

394 In mid-level sections ( $\beta$  -1.78;  $n = 5$  rats), the overall CR<sup>+</sup> (Fig. 3A, magenta) and CB<sup>+</sup> (Fig. 3A,  
395 green) cell and fiber densities were similarly distributed to the rostral levels. A notable change was more  
396 abundant CR<sup>+</sup> labeling in habenula, mediodorsal, anterodorsal and centromedial nuclei of the thalamus,  
397 and CB<sup>+</sup> cell densities in interanteromedial and anteriomedial nuclei of the thalamus, and the  
398 hypothalamus. CR<sup>+</sup> cells were visually more prominent in dorsal midline thalamus and CB<sup>+</sup> cells were

399 more prominent in ventral midline thalamus, but CR<sup>+</sup> and CB<sup>+</sup> cells were found in all regions including  
400 PVT, PT, RE and RH to differing degrees (Fig. 3B & C).

401 ***Distinctive CR<sup>+</sup> and CB<sup>+</sup> cell labeling in PVT and PT at mid-levels of midline thalamus***

402 In mid-level coronal sections, PVT CR<sup>+</sup> cells were dense ( $M = 11.346$ ,  $SD = 3.771$ , density in cells  
403 per  $0.01\text{mm}^2$ ), bright, and packed together in large circular clusters located laterally (Fig. 3B). There was  
404 notably sparse cell labeling in dorsal PVT with extensive CR<sup>+</sup> puncta organized in dense fiber fields that  
405 often ran along the dorsal-ventral axis and thickened at the 3V border. CB<sup>+</sup> cells were less dense ( $M =$   
406  $9.604$ ,  $SD = 3.516$ , density in cells per  $0.01\text{mm}^2$ ), appeared lighter than CR<sup>+</sup> cells, and largely overlapped  
407 topographically with CR<sup>+</sup> cells (Fig. 3B, D<sub>i</sub>-D<sub>iv</sub>). Unlike CR<sup>+</sup> cells, CB<sup>+</sup> cells showed no clear tendency to  
408 cluster. Dual-labeled CR<sup>+</sup>/CB<sup>+</sup> cells were found interspersed equally in CR or CB cell rich areas and  
409 accounted for 50.56% of CR<sup>+</sup> cells and 62.84% of CB<sup>+</sup> cells.

410 In contrast to rostral levels, mid-level PT CR<sup>+</sup> cells were mostly confined to ventral areas and  
411 comingled with CB<sup>+</sup> cells (Fig. 3B). However, dorsal PT had profuse CR<sup>+</sup> puncta visibly organized into  
412 fibers traversing around cells in meshed-wire pattern (e.g., Moyer et al., 2011). Generally, CR<sup>+</sup> cells were  
413 very sparse ( $M = 1.578$ ,  $SD = 0.826$ , density in cells per  $0.01\text{mm}^2$ ) and CB<sup>+</sup> cells were abundant ( $M =$   
414  $9.805$ ,  $SD = 3.935$ , density in cells per  $0.01\text{mm}^2$ ). Dual-labeled CR<sup>+</sup>/CB<sup>+</sup> cells were also sparse  
415 accounting for 48.65% of CR<sup>+</sup> cells and 7.83% of CB<sup>+</sup> cells.

416 ***Distinctive CR<sup>+</sup> and CB<sup>+</sup> labeling in RE and RH at mid-levels of midline thalamus***

417 In mid-level sections, RE and RH showed distinctive patterns of CR<sup>+</sup> and CB<sup>+</sup> labeling (Fig. 3C).  
418 Compared to rostral levels, mid-level RE CR<sup>+</sup> cells were bright and abundant ( $M = 8.910$ ,  $SD = 1.683$ ,  
419 cells per  $0.01\text{mm}^2$ ) with a slight shift in location ventrally and laterally towards the early formation of RE  
420 wings, and defined the lower border. CR<sup>+</sup> cells were also seen along the lateral borders of RE, and  
421 dorsomedially (Fig. 3C). By comparison, CB<sup>+</sup> cells ( $M = 11.520$   $SD = 2.622$ , cells per  $0.01\text{mm}^2$ ), were  
422 localized throughout RE with independent (non-overlapping) populations in dorsal and dorsolateral  
423 regions. Notably at this level, RE CB<sup>+</sup> cells in dorsolateral portions showed a very large cell body size that  
424 contrasted to that of smaller RE CB<sup>+</sup> cells in its ventrolateral division (Fig. 3E<sub>i</sub>-E<sub>ii</sub> & Table S1). Dual-



425 labeled CR<sup>+</sup>/CB<sup>+</sup> were mostly located along the lateral and ventral borders of RE, and as patchy clusters  
426 in centromedial and ventrolateral divisions of RE (Fig. 3C). CR<sup>+</sup>/CB<sup>+</sup> cells accounted for 55.05% of CR<sup>+</sup>  
427 cells and 41.73% of CB<sup>+</sup> cells (Fig. 3E<sub>iii</sub>-E<sub>iv</sub>).

428 In RH, CR<sup>+</sup> cells were scarce ( $M = 1.760$ ,  $SD = 1.017$ , cells per 0.01mm<sup>2</sup>), and presented similar  
429 brightness and circular organization of that of PVT cells. CR<sup>+</sup> cells were primarily confined to medial RH  
430 (Fig. 3C), with CR<sup>+</sup> fibers present laterally. By contrast, CB<sup>+</sup> cells were not bright but were plentiful  
431 throughout RH ( $M = 10.373$ ,  $SD = 2.703$ , cells per 0.01mm<sup>2</sup>) with a tendency to cluster in lateral ends.  
432 Dual-labeled CR<sup>+</sup>/CB<sup>+</sup> cells accounted for 50.71% of CR<sup>+</sup> cells and 8.60% of CB<sup>+</sup> cells.

### 433 ***Mid-level PVT and RE show opposing CR<sup>+</sup>, CB<sup>+</sup>, and CR<sup>+</sup>/CB<sup>+</sup> cell density and cell size patterns***

434 In mid-levels, PVT and RE differences remained clear with PVT showing dominant CR<sup>+</sup> labeling  
435 with CB<sup>+</sup> cells interspersed, and RE showing more CB<sup>+</sup> labeling dorsally and medially with CR<sup>+</sup> cell zones  
436 seen ventrally and laterally. We compared overall CR<sup>+</sup> and CB<sup>+</sup> cell densities in PVT and RE. There was  
437 no main effect of cell density by calcium binding protein expressed ( $F_{(1,4)} = 0.317$ ,  $p = 0.604$ ) or region  
438 ( $F_{(1,4)} = 0.012$ ,  $p = 0.918$ ), but there was a significant interaction effect ( $F_{(1,4)} = 8.702$ ,  $p = 0.042$ ). As in  
439 rostral sections, mid-level PVT had relatively more CR<sup>+</sup> cells, and RE had more CB<sup>+</sup> cells (Fig. 3F). Unlike  
440 in rostral sections, there were no significant differences in the densities of dual-labeled CR<sup>+</sup>/CB<sup>+</sup> cells  
441 (paired-samples  $t_{(4)} = 0.366$ ,  $p = 0.733$ ). A comparison of CR<sup>+</sup> and CB<sup>+</sup> cell sizes in PVT and RE (Fig. 3G)  
442 showed no differences by calcium binding protein expression ( $F_{(1,335)} = 0.040$ ,  $p = 0.843$ ), a significant  
443 effect of region (PVT;  $F_{(1,335)} = 6.406$ ,  $p = 0.012$ ), and no significant interaction effect ( $F_{(1,335)} = 0.994$ ,  $p =$   
444 0.320). That is, PVT cells tended to be slightly larger (8.33%) than RE (Fig. 3G & Table S1).

### 445 ***CR<sup>+</sup> and CB<sup>+</sup> labeling distributions in caudal midline thalamus***

446 In caudal sections ( $\beta$ -2.76;  $n = 4$  rats), there were some notable variations in the overall  
447 distribution of CR<sup>+</sup> and CB<sup>+</sup> labeling (Fig. 4A) including that CR<sup>+</sup> cell and fiber densities were now seen in  
448 basolateral amygdala, and CB<sup>+</sup> staining increased in prominence in striatum. In midline thalamus, CR<sup>+</sup>  
449 staining dorsally remained high (Fig. 4B). The balance of CR<sup>+</sup> and CB<sup>+</sup> labeling in ventral midline  
450 thalamus shifted whereby RE CR<sup>+</sup> labeling intensity increased, and RH CB<sup>+</sup> staining intensity increased,

451 as compared to more rostral sections (Fig. 4C). Nuclei located centromedially in thalamus had numerous  
452 CB<sup>+</sup> cells, while CR<sup>+</sup> cells were less abundant (Fig. 4A). As before, cells expressing both types of calcium  
453 binding proteins were found in all midline thalamic structures examined in detail including PVT, RE, and  
454 RH.

#### 455 ***Caudal PVT CR<sup>+</sup> and CB<sup>+</sup> labeling***

456 In caudal PVT, expression of CR<sup>+</sup> cells ( $M = 10.950$ ,  $SD = 3.588$ , cells per 0.01mm<sup>2</sup>) were bright  
457 and clustered tightly just off the midline running along the dorsal/ventral axis, similar to more rostral  
458 sections (Fig. 4B). Dorsal PVT was absent of any cell labeling for CR or CB, but was dense with CR<sup>+</sup>  
459 fibers. CB<sup>+</sup> cells ( $M = 8.935$ ,  $SD = 2.412$ , cells per 0.01mm<sup>2</sup>) in caudal PVT lightly stained and were seen  
460 throughout the structure. CB<sup>+</sup> cells were especially noticeable in the lateral and ventral portions (Fig 4B).  
461 Dual-labeling CR<sup>+</sup>/CB<sup>+</sup> cells were prominent in dorsolateral areas accounting for 52.64% of CR<sup>+</sup> cells and  
462 56.93% of CB<sup>+</sup> cells (Fig. 4Di-Div).

#### 463 ***Distinctive CR<sup>+</sup> and CB<sup>+</sup> labeling in RE, PRe, and RH in caudal midline thalamus***

464 In caudal sections, distinct topographical organizations of CR<sup>+</sup> and CB<sup>+</sup> cells emerged in RH, RE,  
465 and PRe. Caudal RE CR<sup>+</sup> cells ( $M = 10.560$ ,  $SD = 2.845$ , cells per 0.01mm<sup>2</sup>) retained a bright color and  
466 were mostly located dorsolaterally, unlike earlier rostro-caudal levels. The ventral portion of RE was  
467 largely void of cells that labeled for either calcium binding protein. A network of CR<sup>+</sup> fibers located closed  
468 to 3V, occupied most of this region along with a few CR<sup>+</sup> cells located laterally. (Fig. 4C). CR<sup>+</sup> cell  
469 expression was low in PRe (Fig. 4C), a structure known to be rich in RE neurons projecting to mPFC  
470 (Cassel et al., 2013; Dolleman-van der Weel et al., 2019). RE CB<sup>+</sup> cells ( $M = 11.673$ ,  $SD = 3.106$ ), cells  
471 per 0.01mm<sup>2</sup>) were seen prominently along the lateral borders, where they overlapped heavily with CR<sup>+</sup>  
472 cells (Fig. 4E<sub>i</sub>-E<sub>iv</sub>). CB<sup>+</sup> cells were abundant throughout PRe. In the ventralmedial portion of RE, CB<sup>+</sup> cells  
473 were few, small, and scattered (Fig. 4E; see Table S1). Dual-labeling CR<sup>+</sup>/CB<sup>+</sup> cells were seen throughout  
474 the dorsal and medial subdivisions of RE and in PRe. CR<sup>+</sup>/CB<sup>+</sup> cells accounted for 64.30% of CR<sup>+</sup> cells  
475 and 58.18% of CB<sup>+</sup> cells in RE (Fig. 4E).

476 In caudal RH, CR<sup>+</sup> were largely absent ( $M = 2.163$ ,  $SD = 1.368$ , cells per 0.01mm<sup>2</sup>), while CB<sup>+</sup>  
477 cells ( $M = 7.630$ ,  $SD = 5.344$ , cells per 0.01mm<sup>2</sup>) were abundant and present through the region (Fig. 4C).  
478 RH CR<sup>+</sup> cells were mainly located in the mediodorsal and medioventral borders of RH, while CB<sup>+</sup> cells  
479 were heavily distributed in the lateral wings with a relatively large size (Fig. 4C). Dual-labeled CR<sup>+</sup>/CB<sup>+</sup>  
480 expression accounted for 31.02% of CR<sup>+</sup> cells and 8.78% of CB<sup>+</sup> cells.

#### 481 ***Caudal PVT and RE have different CR<sup>+</sup>, CB<sup>+</sup>, and CR<sup>+</sup>/CB<sup>+</sup> cell density and cell size patterns***

482 In caudal midline thalamus, the overall pattern of CR<sup>+</sup> and CB<sup>+</sup> cell densities in PVT and RE  
483 appeared to match well with more rostral sections. There were proportionally more CR<sup>+</sup> than CB<sup>+</sup> cells in  
484 PVT, and more CB<sup>+</sup> than CR<sup>+</sup> cells in RE, although these differences were moderate (Fig. 4F). We  
485 compared overall CR<sup>+</sup> and CB<sup>+</sup> cell densities in caudal PVT and RE. There was no main effect of calcium  
486 binding protein expression ( $F_{(1,3)} = 0.542$ ,  $p = 0.515$ ), or region ( $F_{(1,3)} = 0.519$ ,  $p = 0.523$ ), but there was a  
487 significant trend towards and interaction effect ( $F_{(1,3)} = 7.836$ ,  $p = 0.68$ ). Similar to mid-level sections, there  
488 was no significant difference in the proportion of dual-labeled CR<sup>+</sup>/CB<sup>+</sup> cells in PVT and RE (paired-  
489 sample  $t_{(3)} = -1.258$ ,  $p = 0.297$ ). A comparison of CR<sup>+</sup> and CB<sup>+</sup> cell sizes in caudal PVT and caudal RE  
490 (Fig. 4G) showed no differences by calcium binding proteins ( $F_{(1,310)} = 1.996$ ,  $p = 0.159$ ), no region effect  
491 ( $F_{(1,310)} = 1.265$ ,  $p = 0.262$ ), and no interaction effect ( $F_{(1,310)} = 0.011$ ,  $p = 0.917$ )(Fig. 4G).

#### 492 **Distributions of CR<sup>+</sup> and CB<sup>+</sup> in RE subregions using 3,3'-Diaminobenzidine (DAB)**

493 Notably, the results of the immunofluorescence experiments revealed topographically biased  
494 clusters of CR<sup>+</sup> and CB<sup>+</sup> cell populations in RE, the largest of the midline thalamic nuclei (Arai et al., 1994;  
495 Bokor et al., 2002; Winsky et al., 1992) that varied across the rostral-caudal axis. We further investigated  
496 the distribution of RE CR<sup>+</sup> and CB<sup>+</sup> cells with DAB in all the RE internal subdivisions from those  
497 established in Swanson brain atlas (2018) including five rostro-caudal levels of the rat's midline thalamus  
498 ( $n = 13$  rats, 7 CR and 6 CB) to confirm these patterns and densities. The results were entirely consistent  
499 with the immunofluorescence in that all subregions of RE tended to have higher CB<sup>+</sup> cell area densities  
500 than CR<sup>+</sup> cell densities, except RE medial (Fig. 5). The cell area densities found with the DAB staining of  
501 CR<sup>+</sup> and CB<sup>+</sup> was almost identical to that of our immunofluorescence reactions (see above and Table S2),

502 and the topographies were the same. Figure 5C summarizes our findings by atlas subregion showing that  
503 CB<sup>+</sup> cell densities were consistently higher than CR<sup>+</sup> cell densities, with the exception of cells at RE  
504 medial (RE<sub>m</sub>) division. The same was true of RE caudoposterior (RE<sub>cp</sub>) division, but only at mediocaudal  
505 levels. Notably, in rostromedial (reuniens lateral-RE<sub>l</sub> and reuniens ventral division-RE<sub>v</sub>) and caudal levels  
506 (reuniens caudal dorsal division-RE<sub>cd</sub>) CB<sup>+</sup> cell densities were about twice the density of CR<sup>+</sup> cells (with  
507 the exception of RE<sub>m</sub>). We calculated the overall effect size across all RE subregions and levels and  
508 found a modest effect of CB<sup>+</sup> density (Hedge's  $d = .32$ ).

### 509 **Dual-site mPFC-HC projecting RE neurons are not CB<sup>+</sup> or CR<sup>+</sup>**

510 A noteworthy feature of the midline thalamus is the presence of cells with monosynaptic  
511 projections to both mPFC and HC (Hoover & Vertes, 2012; Varela et al., 2014) which are thought to  
512 contribute to rhythmic synchrony and communication in the mPFC-HC memory system (M. J. Dolleman-  
513 van der Weel et al., 2019). Thus, we performed additional experiments to examine the calcium binding  
514 protein expression in dual mPFC-HC projecting cells in RE. To do this, we injected two AAV retrograde  
515 viral vectors in mPFC (prelimbic and infralimbic cortex; rAAV-CAG-tdTomato) and HC (ventral CA1; rAAV-  
516 CAG-GFP) and then imaged the resultant tdTomato (red) and GFP (green) expression in RE (Fig. 6A) ( $n$   
517 = 4 rats). Coronal sections were counterstained with DAB to label CR ( $n = 2$ ) and CB ( $n = 2$ ) (see Figure  
518 S1). We found cells in RE that were dual-labeled (Fig. 6B, yellow) that clustered predominantly in  
519 consistent dorsal and ventral locations near the midline (Fig. 6B, cyan squares). Dual mPFC-HC  
520 projecting cells represented only a small proportion of RE cells in the area (Fig. 6C) consistent with  
521 previous reports (Hoover & Vertes, 2012; Varela et al., 2014). Next, we looked at whether CR<sup>+</sup> or CB<sup>+</sup>  
522 cells co-localized with dual mPFC-HC projecting cells in RE. Surprisingly, no CR<sup>+</sup> and CB<sup>+</sup> cells  
523 overlapped RE dual-projecting cells. We also noticed (as before in Figs. 2-4C) that there were CR<sup>+</sup> and  
524 CB<sup>+</sup> sparse areas, and interestingly these appeared to contain dual mPFC-HC projecting cells. To  
525 examine this visual impression quantitatively, we measured the distance from a sample of RE dual-  
526 projecting cells ( $n = 49$ ) to every CR<sup>+</sup> and CB<sup>+</sup> cell within a 100-micron radius ( $D_{ii}$ - $E_{ii}$ ). There were very few  
527 CR<sup>+</sup> and CB<sup>+</sup> cells nearby RE dual-projecting cells, and this count progressively increased with distance

528 (Fig. 6F<sub>ii</sub>-G<sub>ii</sub>). To confirm this relationship, we ran a linear regression between the cell counts by distance.  
529 We found that CR<sup>+</sup> cell and CB<sup>+</sup> cell counts both increased significantly as a function of distance from  
530 dual mPFC-HC projecting cells in RE (dorsal clusters: CR<sup>+</sup> cells  $r = .57$ ,  $r^2 = .328$ ; CB<sup>+</sup>  $r = .80$ ,  $r^2 = .646$ ;  
531 ventral clusters: CR<sup>+</sup> cells  $r = .84$ ,  $r^2 = .706$ ; CB<sup>+</sup>  $r = .84$ ,  $r^2 = .888$ ; all  $p$ 's < 0.01). Overall, these findings  
532 show that dual mPFC-HC projecting cells in RE are a neurobiologically unique cell type in that they lack  
533 CR and CB (and PV) expression, and that their local cytoarchitecture clusters them within CB<sup>+</sup> and CR<sup>+</sup>  
534 cell nests that occurred in multiple topographic locations within RE.

535

536

## DISCUSSION

### 537 **Summary of Main Findings**

538 The present study examined the calcium binding protein (PV, CR and CB) organization of the  
539 midline thalamus focusing on PVT, PT, RH and RE using a dual-labeling immunofluorescence approach.  
540 We further targeted specific dual mPFC-RE projecting cells in RE using a dual retrograde AAV tracing  
541 technique because these cells are theoretically critical to synchronous mPFC and HC activity (Dolleman-  
542 van der Weel et al., 2019; Hoover & Vertes, 2012; Varela et al., 2014). First, we did not find any PV<sup>+</sup> cells  
543 in any of the nuclei of the midline thalamus, consistent with previous reports (Celio, 1990; Arai et al.,  
544 1994; Bokor et al., 2002). However, we did find an abundance of PV<sup>+</sup> fibers in midline thalamus which are  
545 known to be inhibitory afferents from TRN (Albéri et al., 2013; Arai et al., 1994; McKenna & Vertes, 2004).  
546 Next, we demonstrated that CR<sup>+</sup> and CB<sup>+</sup> labeling organized the midline thalamus into distinct cell-type  
547 dominant zones. Notably, the dorsal and ventral CR<sup>+</sup> and CB<sup>+</sup> patterns mirrored each other suggesting a  
548 common developmental trajectory of CR<sup>+</sup> and CB<sup>+</sup> cell densities throughout the midline thalamus  
549 (Frassoni et al., 1998) in a pattern that simply flipped around the curvature of the rostral thalamus and 3V  
550 (e.g., vertically flipping Fig. 2C aligns the cell distributions of RE exceptionally well with those in Fig. 2B).  
551 That is, the dorsal midline thalamus (PVT and PT) contained a high density of CR<sup>+</sup> cells and fibers that  
552 resembled a “T” or “Y” bordering the walls of the dorsal 3V and populating the midline. Whereas, CB<sup>+</sup>  
553 cells were populated ventrolaterally and dense in PT. The ventral midline thalamus (RH and RE)

554 contained a high density of CR<sup>+</sup> cells resembling an inverted “T” or “Y” bordering the walls of the ventral  
555 3V and occupied the midline including the center of rostral RH. CB<sup>+</sup> cells in ventral midline thalamus were  
556 situated dorsolaterally and in lateral and caudal RH. Throughout the midline thalamus, dual-labeled  
557 CR<sup>+</sup>/CB<sup>+</sup> cells were contained in partially overlapping single-labeled CR<sup>+</sup> and CB<sup>+</sup> zones. We detailed  
558 subregional variations on these patterns throughout the results, noting RE had the most complexity  
559 (summarized in Fig. 7). While we found a consistently opposing pattern of CR and CB cell density in PVT  
560 and RE across the rostro-caudal axis of the thalamus, with CR<sup>+</sup> cell density higher in PVT and CB<sup>+</sup> cell  
561 density was higher in RE, these differences may be, in part, due to the lack of an atlas separation for the  
562 CB<sup>+</sup> cell population in the dorsolateral areas of RE in the way that PT is separated from PVT. Lastly, we  
563 showed that dual mPFC-HC projecting cells labeled with neither CR or CB, but were surrounded by rings  
564 of cells expressing both calcium binding proteins (composed of CR<sup>+</sup>, CB<sup>+</sup>, and CR<sup>+</sup>/CB<sup>+</sup> cells). These dual  
565 mPFC-HC projecting center-ring organizations are potentially important microcircuits for midline thalamic  
566 integration and mPFC-HC synchronization.

### 567 ***Calcium Binding Protein Distributions in Midline Thalamus***

568 Overall, our results are in strong agreement with the outcomes of other studies that looked at the  
569 distribution of the calcium binding proteins in the rat thalamus that indicated that the midline thalamus is  
570 particularly rich/dense with CR<sup>+</sup> and CB<sup>+</sup> cells (Arai et al., 1994; Bokor et al., 2002; Winsky et al., 1992).  
571 However, we detail a few important differences with respect to the findings described in Arai et al. (1994),  
572 who productively used a single-labeling chromagen approach, on the distribution of the CR<sup>+</sup> and CB<sup>+</sup> cells  
573 in PVT, RH, and RE (our PT findings were nearly identical). First, Arai et al. (1994) indicated PVT was  
574 mainly a CR-containing structure while we found both CB<sup>+</sup> and dual-labeled CR<sup>+</sup>/CB<sup>+</sup> cells common  
575 throughout the region. PVT CR-labeling intensity and cells sizes were notably greater than for CB in PVT.  
576 Second, Arai et al., (1994) showed RH was mostly a CR-containing structure, but our data demonstrates  
577 that this is only true at the most rostromedial levels of RH. In stark contrast, we found that CB<sup>+</sup> cells were  
578 almost exclusively populated at lateral and caudal levels of RH. Third, with respect to RE, Arai et al.  
579 (1994) described this nucleus as containing similar densities of CR and CB, while we demonstrate that

580 RE contained more CB<sup>+</sup> than CR<sup>+</sup> cells and exhibits several distinct CR<sup>+</sup>, CB<sup>+</sup> and CR<sup>+</sup>/CB<sup>+</sup> cell zones  
581 (see Fig. 7 for details). The differences we found are likely due to the fact that we used a dual-labeling  
582 immunofluorescence protocol that was (1) more able to pick up on detailed distributions of CR<sup>+</sup> and CB<sup>+</sup>  
583 labeling in direct relationship to each other, and (2) confirm the identity of dual-labeled CR<sup>+</sup>/CB<sup>+</sup> cells with  
584 a confocal z-stack analysis.

### 585 ***Functional Implication of CR<sup>+</sup> and CB<sup>+</sup> Topographies in Midline Thalamus***

586 It well known that calcium binding proteins such as CR<sup>+</sup> and CB<sup>+</sup> are crucially involved in neuronal  
587 functions. While CR and CB have been chiefly classified as slow buffers, recent work suggest they can  
588 also act as calcium sensors (Nelson & Chazin, 1998; Schwaller, 2014) Generally, calcium binding proteins  
589 have been used as an important tool in differentiating various cell types in the brain (Andressen et al.,  
590 1993; Arai et al., 1994; DeFelipe, 1997; Gulyás et al., 1996; Jones & Hendry, 1989). In fact, an early  
591 classification of the thalamus separated cells based on their calcium binding protein expression (Jones,  
592 1998; Jones, 2001). Of these, CB<sup>+</sup> cells in midline thalamus were classified as 'matrix' cells because of  
593 their dedicated projections to multimodal sensory regions in superficial layers of the cortex; and PV<sup>+</sup> cells  
594 were considered 'core' cells for their projections to areas involved in the processing of sensory or motor  
595 information in middle cortical layers. While we did not find any PV<sup>+</sup> cells in midline thalamus, CB<sup>+</sup> cells  
596 were abundant especially in PT, RH and dorsolateral RE. The midline thalamus might be considered  
597 composed entirely of matrix cells involved in the processing of information from multiple brain regions in  
598 much the same way promoting cortico-thalamo-cortico synchronization, although the value of this  
599 distinction is not clear for further understanding subregional microcircuits in the midline thalamus without  
600 further investigation (Dolleman-van der Weel et al., 2019). While a role of CR is less known at this level of  
601 analysis, a population of CR<sup>+</sup> RE cells that project to entorhinal cortex has been described (Wouterlood et  
602 al., 2007). We assume this is reflected in our observation of very dense and prominent CR<sup>+</sup> fibers that  
603 extended throughout the shallow layers of entorhinal cortex but did not extend into perirhinal cortex, or  
604 into other cortices, which appeared to have more CB<sup>+</sup> labeling. Given these entorhinal projections, CR<sup>+</sup>  
605 cells in midline thalamus also seem to target multimodal sensory regions of cortex like CB<sup>+</sup> cells. This

606 suggest that the existence of separate and unique CR and CB zones in midline thalamus represent  
607 separate thalamo-cortical circuits.

608 Distinct CR<sup>+</sup>, CB<sup>+</sup> and CR<sup>+</sup>/CB<sup>+</sup> topographical zones in midline thalamus are likely associated with  
609 distinct rhythmicity like delta (e.g., Roy et al., 2017; Ferraris et al., 2018; Todorova and Zugaro, 2019;  
610 Schultheiss et al., 2020), theta (Hallock et al., 2016; Hasselmo et al., 2002; Jankowski et al., 2014; Lara-  
611 Vásquez et al., 2016; Roy et al., 2017; Vertes et al., 2004), or with sharp-wave ripples (Jadhav et al.,  
612 2012; Jadhav et al., 2016). Good support for this notion stems from the demonstration that CR<sup>+</sup> cells in  
613 midline thalamus exhibit distinct *in vivo* electrophysiological profiles (Lara-Vásquez et al., 2016).  
614 Specifically, Lara-Vasquez et al. (2016) found that CR<sup>+</sup> cells were more prone to bursting, not recruited in  
615 HC theta states, and inhibited by sharp-wave ripples. They also found that CR<sup>-</sup> neurons were less prone  
616 to bursting and had no apparent relationship to theta (regardless of labeling for CB). These cells were  
617 sampled from across the dorsal-ventral extent of the midline thalamus signifying a primal role for calcium  
618 binding protein status. Combined with the present results, this suggests special considerations should be  
619 given when recording from midline thalamic neurons as to their calcium binding protein identity. For  
620 example, activity recorded from the CR-rich zones in RE located along the midline or near the third  
621 ventricle will likely differ significantly from RE activity recorded from the CB-rich dorsolateral areas,  
622 particularly with respect to their rhythmic and bursting profiles.

### 623 ***Dual mPFC-HC projecting RE cells are distinct from CR<sup>+</sup> and CB<sup>+</sup> cell populations***

624 Using a retrograde AAV viral approach we observed distinct and stereotyped clusters of RE cells  
625 with monosynaptic projections both to mPFC (prelimbic and infralimbic area) and ventral CA1. This finding  
626 is in agreement with two other studies that used more traditional tracing techniques (Hoover & Vertes,  
627 2012; Varela et al., 2014). Specifically, Hoover and Vertes (2012) found several clusters of dual labeled  
628 cells in RE following injections of the retrograde tracers fluorogold and fluororuby in mPFC (PL/IL) and  
629 dorsal CA1, and in vCA1 and subiculum. Hoover and Vertes (2012) suggested that the functional roles of  
630 these cells were to support limbic subcortical and cortical interactions and/or the convergence and  
631 integration among other limbic-related structures. Varela et al. (2014) also demonstrated the existence of



632 dual mPFC-HC projecting cells in RE following injections of cholera toxin (CTB) tracers. Varela et al.  
633 (2014) speculated these cells may be critical for the synchronization of target regions during exploration,  
634 transfer of mnemonic information between mPFC-HC, and modulation of certain phases of cortical spindle  
635 oscillations. It's notable that we found that the dual projecting cells lacked CR or CB, but were surrounded  
636 by a ring of CR<sup>+</sup>, CB<sup>+</sup> and CR<sup>+</sup>/CB<sup>+</sup> cells. That is, we observed CB<sup>+</sup>, CR<sup>+</sup> and CR<sup>+</sup>/CB<sup>+</sup> cells formed well-  
637 defined circular clusters in regions that were sparse or seemingly absent of CR<sup>+</sup> or CB<sup>+</sup> cells (within a 100µm  
638 radius). Reliably, CR and CB cell densities were scant near dual mPFC-HC projecting cells, but cell  
639 densities rapidly increased with distance. Speculatively, this organization may provide a microcircuit  
640 means for integrating input activity from several different cell types and then synchronizing outputs to  
641 mPFC and CA1 for triggering coordinated rhythmic modes (e.g., delta or theta). Interrogating these cells  
642 further will require sophisticated functional approaches such as optogenetics delivered with combinatorial  
643 retrograde and Cre-dependent viral constructs.

#### 644 **Conclusion**

645 Most often, neurons in midline thalamus are assumed to be a relatively homogeneous group of  
646 excitatory (glutamatergic) projection neurons (Bokor et al., 2002), but here we detailed several distinct  
647 zones in the midline thalamus based on the expression of CR and CB, or lack thereof in dual mPFC-HC  
648 projecting cells. While experiments have productively targeted entire regions of the midline thalamus,  
649 most commonly RH/RE with inactivations or lesions (Cholvin et al., 2013; Hallock et al., 2013; Hembrook  
650 et al., 2012; Layfield et al., 2015; Loureiro et al., 2012), we suggest it may be more productive for future  
651 experiments to separately target CR<sup>+</sup>, CB<sup>+</sup>, and dual mPFC-HC projecting cells to better understand the  
652 computational and/or rhythmic contributions of the midline thalamus to the mPFC-HC system.

653

654

655 **REFERENCES**

- 656 Ahn, J. H., Hong, S., Park, J. H., Kim, I. H., Cho, J. H., Lee, T.-K., Lee, J.-C., Chen, B. H., Shin, B.-N.,  
657 Bae, E. J., Jeon, Y. H., Kim, Y.-M., Won, M.-H., & Choi, S. Y. (2017). Immunoreactivities of calbindin-  
658 D28k, calretinin and parvalbumin in the somatosensory cortex of rodents during normal aging.  
659 *Molecular Medicine Reports*, 16(5), 7191–7198. <https://doi.org/10.3892/mmr.2017.7573>
- 660 Aika, Y., Ren, J. Q., Kosaka, K., & Kosaka, T. (1994). Quantitative analysis of GABA-like-immunoreactive  
661 and parvalbumin-containing neurons in the CA1 region of the rat hippocampus using a stereological  
662 method, the disector. *Experimental Brain Research*, 99(2). <https://doi.org/10.1007/BF00239593>
- 663 Al-Mashhadi, S., Simpson, J. E., Heath, P. R., Dickman, M., Forster, G., Matthews, F. E., Brayne, C.,  
664 Ince, P. G., Wharton, S. B., & Medical Research Council Cognitive Function and Ageing Study.  
665 (2015). Oxidative glial cell damage associated with white matter lesion in the aging human brain:  
666 Oxidative damage in white matter lesions. *Brain Pathology*, 25(5), 565–574.  
667 <https://doi.org/10.1111/bpa.12216>
- 668 Albéri, L., Lintas, A., Kretz, R., Schwaller, B., & Villa, A. E. P. (2013). The calcium-binding protein  
669 parvalbumin modulates the firing 1 properties of the reticular thalamic nucleus bursting neurons.  
670 *Journal of Neurophysiology*, 109(11), 2827–2841. <https://doi.org/10.1152/jn.00375.2012>
- 671 Andressen, C., Blümcke, I., & Celio, M. R. (1993). Calcium-binding proteins: Selective markers of nerve  
672 cells. *Cell and Tissue Research*, 271(2), 181–208. <https://doi.org/10.1007/BF00318606>
- 673 Anaconda Software Distribution. (2016). Anaconda (Version 2-2.4.0). [Computer software]. Retrieved  
674 from: <https://anaconda.com>
- 675 Arai, R., Jacobowitz, D. M., & Deura, S. (1994). Distribution of calretinin, calbindin-D28k, and parvalbumin  
676 in the rat thalamus. *Brain Research Bulletin*, 33(5), 595–614. [https://doi.org/10.1016/0361-](https://doi.org/10.1016/0361-9230(94)90086-8)  
677 [9230\(94\)90086-8](https://doi.org/10.1016/0361-9230(94)90086-8)
- 678 Barker, G. R. I., & Warburton, E. C. (2018). A critical role for the nucleus reuniens in long-term, but not  
679 short-term associative recognition memory formation. *The Journal of Neuroscience*, 38(13), 3208–  
680 3217. <https://doi.org/10.1523/JNEUROSCI.1802-17.2017>

- 681 Bokor, H., Csáki, Á., Kocsis, K., & Kiss, J. (2002). Cellular architecture of the nucleus reuniens thalami  
682 and its putative aspartatergic/glutamatergic projection to the hippocampus and medial septum in the  
683 rat: Reuniens connection to hippocampus and septum. *European Journal of Neuroscience*, *16*(7),  
684 1227–1239. <https://doi.org/10.1046/j.1460-9568.2002.02189.x>
- 685 Braak, H., & Braak, E. (1991). Alzheimer's disease affects limbic nuclei of the thalamus. *Acta*  
686 *Neuropathologica*, *81*(3), 261–268. <https://doi.org/10.1007/BF00305867>
- 687 Burwell, R. D. (2000). The parahippocampal region: Corticocortical connectivity. *Annals of the New York*  
688 *Academy of Sciences*, *911*, 25–42. <https://doi.org/10.1111/j.1749-6632.2000.tb06717.x>
- 689 Cassel, J.-C., de Vasconcelos, A., Loureiro, M., Cholvin, T., Dalrymple-Alford, J. C., & Vertes, R. P.  
690 (2013). The reuniens and rhomboid nuclei: Neuroanatomy, electrophysiological characteristics and  
691 behavioral implications. *Progress in Neurobiology*, *111*, 34–52.  
692 <https://doi.org/10.1016/j.pneurobio.2013.08.006>
- 693 Celio, M. R. (1990). Calbindin D-28k and parvalbumin in the rat nervous system. *Neuroscience*, *35*(2),  
694 375–475. [https://doi.org/10.1016/0306-4522\(90\)90091-H](https://doi.org/10.1016/0306-4522(90)90091-H)
- 695 Cenquizca, L. A., & Swanson, L. W. (2007). Spatial organization of direct hippocampal field CA1 axonal  
696 projections to the rest of the cerebral cortex. *Brain Research Reviews*, *56*(1), 1–26.  
697 <https://doi.org/10.1016/j.brainresrev.2007.05.002>
- 698 Choi, E. A., & McNally, G. P. (2017). Paraventricular thalamus balances danger and reward. *The Journal*  
699 *of Neuroscience*, *37*(11), 3018–3029. <https://doi.org/10.1523/JNEUROSCI.3320-16.2017>
- 700 Cholvin, T., Loureiro, M., Cassel, R., Cosquer, B., Geiger, K., De Sa Nogueira, D., Raingard, H., Robelin,  
701 L., Kelche, C., de Vasconcelos, A., & Cassel, J.-C. (2013). The Ventral Midline Thalamus  
702 Contributes to Strategy Shifting in a Memory Task Requiring Both Prefrontal Cortical and  
703 Hippocampal Functions. *Journal of Neuroscience*, *33*(20), 8772–8783.  
704 <https://doi.org/10.1523/JNEUROSCI.0771-13.2013>
- 705 Churchwell, J. C., & Kesner, R. P. (2011). Hippocampal-prefrontal dynamics in spatial working memory:  
706 Interactions and independent parallel processing. *Behavioural Brain Research*, *225*(2), 389–395.

707 <https://doi.org/10.1016/j.bbr.2011.07.045>

708 Condé, F., Lund, J. S., Jacobowitz, D. M., Baimbridge, K. G., & Lewis, D. A. (1994). Local circuit neurons

709 immunoreactive for calretinin, calbindin D-28k or parvalbumin in monkey prefrontal cortex:

710 Distribution and morphology: CALCIUM-BINDING PROTEINS IN MONKEY PREFRONTAL

711 CORTEX. *Journal of Comparative Neurology*, 341(1), 95–116.

712 <https://doi.org/10.1002/cne.903410109>

713 Csillik, B., Mihály, A., Krisztin-Péva, B., Chadaide, Z., Samsam, M., Knyihár-Csillik, E., & Fenyó, R.

714 (2005). GABAergic parvalbumin-immunoreactive large calyciform presynaptic complexes in the

715 reticular nucleus of the rat thalamus. *Journal of Chemical Neuroanatomy*, 30(1), 17–26.

716 <https://doi.org/10.1016/j.jchemneu.2005.03.010>

717 DeFelipe, J. (1997). Types of neurons, synaptic connections and chemical characteristics of cells

718 immunoreactive for calbindin-D28K, parvalbumin and calretinin in the neocortex. *Journal of Chemical*

719 *Neuroanatomy*, 14(1), 1–19. [https://doi.org/10.1016/S0891-0618\(97\)10013-8](https://doi.org/10.1016/S0891-0618(97)10013-8)

720 del Río, M. R., & DeFelipe, J. (1996). Colocalization of calbindin D-28k, calretinin, and GABA

721 immunoreactivities in neurons of the human temporal cortex. *Journal of Comparative Neurology*,

722 369(3), 472–482. [https://doi.org/10.1002/\(SICI\)1096-9861\(19960603\)369:3<472::AID-](https://doi.org/10.1002/(SICI)1096-9861(19960603)369:3<472::AID-)

723 [CNE11>3.0.CO;2-K](https://doi.org/10.1002/(SICI)1096-9861(19960603)369:3<472::AID-CNE11>3.0.CO;2-K)

724 Dolleman-van der Weel, M. J., Griffin, A. L., Ito, H. T., Shapiro, M. L., Witter, M. P., Vertes, R. P., & Allen,

725 T. A. (2019). The nucleus reuniens of the thalamus sits at the nexus of a hippocampus and medial

726 prefrontal cortex circuit enabling memory and behavior. *Learning & Memory*, 26(7), 191–205.

727 <https://doi.org/10.1101/lm.048389.118>

728 Dolleman-van der Weel, M., & Witter, M. P. (1996). Projections from the nucleus reuniens thalami to the

729 entorhinal cortex, hippocampal field CA1, and the subiculum in the rat arise from different

730 populations of neurons. *Journal of Comparative Neurology*, 364(4), 637–650.

731 [https://doi.org/10.1002/\(sici\)1096-9861\(19960122\)364:4<637::aid-cne3>3.0.co;2-4](https://doi.org/10.1002/(sici)1096-9861(19960122)364:4<637::aid-cne3>3.0.co;2-4)

732 Eichenbaum, H. (2017). Prefrontal–hippocampal interactions in episodic memory. *Nature Reviews*

- 733 *Neuroscience*, 18(9), 547–558. <https://doi.org/10.1038/nrn.2017.74>
- 734 Ferino, F., Thierry, A. M., & Glowinski, J. (1987). Anatomical and electrophysiological evidence for a direct  
735 projection from amon's horn to the medial prefrontal cortex in the rat. *Experimental Brain*  
736 *Research*, 65(2). <https://doi.org/10.1007/BF00236315>
- 737 Ferraris, M., Ghestem, A., Vicente, A. F., Nallet-Khosroffian, L., Bernard, C., & Quilichini, P. P. (2018). The  
738 nucleus reuniens controls long-range hippocampo–prefrontal gamma synchronization during slow  
739 oscillations. *The Journal of Neuroscience*, 38(12), 3026–3038.  
740 <https://doi.org/10.1523/JNEUROSCI.3058-17.2018>
- 741 Fonseca, M., & Soriano, E. (1995). Calretinin-immunoreactive neurons in the normal human temporal  
742 cortex and in Alzheimer's disease. *Brain Research*, 691(1–2), 83–91. [https://doi.org/10.1016/0006-](https://doi.org/10.1016/0006-8993(95)00622-W)  
743 [8993\(95\)00622-W](https://doi.org/10.1016/0006-8993(95)00622-W)
- 744 Frassoni, C., Arcelli, P., Selvaggio, M., & Spreafico, R. (1998). Calretinin immunoreactivity in the  
745 developing thalamus of the rat: A marker of early generated thalamic cells. *Neuroscience*, 83(4),  
746 1203–1214. [https://doi.org/10.1016/S0306-4522\(97\)00443-0](https://doi.org/10.1016/S0306-4522(97)00443-0)
- 747 Fuchs, E. C., Zivkovic, A. R., Cunningham, M. O., Middleton, S., LeBeau, F. E. N., Bannerman, D. M.,  
748 Rozov, A., Whittington, M. A., Traub, R. D., Rawlins, J. N. P., & Monyer, H. (2007). Recruitment of  
749 Parvalbumin-Positive Interneurons Determines Hippocampal Function and Associated Behavior.  
750 *Neuron*, 53(4), 591–604. <https://doi.org/10.1016/j.neuron.2007.01.031>
- 751 Furtak, S. C., Wei, S.-M., Agster, K. L., & Burwell, R. D. (2007). Functional neuroanatomy of the  
752 parahippocampal region in the rat: The perirhinal and postrhinal cortices. *Hippocampus*, 17(9), 709–  
753 722. <https://doi.org/10.1002/hipo.20314>
- 754 Fuster, J. M. (1995). Cognitive Support of Behavior. *Plasticity in the central nervous system: learning and*  
755 *memory*, 149.
- 756 Gelinas, J. N., Khodagholy, D., Thesen, T., Devinsky, O., & Buzsáki, G. (2016). Interictal epileptiform  
757 discharges induce hippocampal–cortical coupling in temporal lobe epilepsy. *Nature Medicine*, 22(6),  
758 641–648. <https://doi.org/10.1038/nm.4084>

- 759 Gulyás, A. I., Hájos, N., & Freund, T. F. (1996). Interneurons Containing Calretinin Are Specialized to  
760 Control Other Interneurons in the Rat Hippocampus. *The Journal of Neuroscience*, 16(10), 3397–  
761 3411. <https://doi.org/10.1523/JNEUROSCI.16-10-03397.1996>
- 762 Hallock, H L, Wang, A., & Griffin, A. L. (2016). Ventral Midline Thalamus Is Critical for Hippocampal-  
763 Prefrontal Synchrony and Spatial Working Memory. *Journal of Neuroscience*, 36(32), 8372–8389.  
764 <https://doi.org/10.1523/JNEUROSCI.0991-16.2016>
- 765 Hallock, Henry L, Wang, A., Shaw, C. L., & Griffin, A. L. (2013). Transient inactivation of the thalamic  
766 nucleus reuniens and rhomboid nucleus produces deficits of a working-memory dependent tactile-  
767 visual conditional discrimination task. *Behavioral Neuroscience*, 127(6), 860–866.  
768 <https://doi.org/10.1037/a0034653>
- 769 Hasselmo, M. E., Bodelón, C., & Wyble, B. P. (2002). A proposed function for hippocampal theta rhythm:  
770 Separate phases of encoding and retrieval enhance reversal of prior learning. *Neural Computation*,  
771 14(4), 793–817. <https://doi.org/10.1162/089976602317318965>
- 772 Hauer, B. E., Pagliardini, S., & Dickson, C. T. (2019). The Reuniens Nucleus of the Thalamus Has an  
773 Essential Role in Coordinating Slow-Wave Activity between Neocortex and Hippocampus. *Eneuro*,  
774 6(5), ENEURO.0365--19.2019. <https://doi.org/10.1523/ENEURO.0365-19.2019>
- 775 Hembrook, J. R., Onos, K. D., & Mair, R. G. (2012). Inactivation of ventral midline thalamus produces  
776 selective spatial delayed conditional discrimination impairment in the rat. *Hippocampus*, 22(4), 853–  
777 860. <https://doi.org/10.1002/hipo.20945>
- 778 Hof, P. R., Glezer, I. I., Condé, F., Flagg, R. A., Rubin, M. B., Nimchinsky, E. A., & Vogt Weisenhorn, D.  
779 M. (1999). Cellular distribution of the calcium-binding proteins parvalbumin, calbindin, and calretinin  
780 in the neocortex of mammals: phylogenetic and developmental patterns. *Journal of Chemical*  
781 *Neuroanatomy*, 16(2), 77–116. [https://doi.org/10.1016/S0891-0618\(98\)00065-9](https://doi.org/10.1016/S0891-0618(98)00065-9)
- 782 Hoover, W. B., & Vertes, R. P. (2012). Collateral projections from nucleus reuniens of thalamus to  
783 hippocampus and medial prefrontal cortex in the rat: A single and double retrograde fluorescent  
784 labeling study. *Brain Structure and Function*, 217(2), 191–209. <https://doi.org/10.1007/s00429-011->

- 785 0345-6
- 786 Hsu, D. T., Kirouac, G. J., Zubieta, J.-K., & Bhatnagar, S. (2014). Contributions of the paraventricular  
787 thalamic nucleus in the regulation of stress, motivation, and mood. *Frontiers in Behavioral*  
788 *Neuroscience*, 8. <https://doi.org/10.3389/fnbeh.2014.00073>
- 789 Hunsaker, M. R., & Kesner, R. P. (2018). Unfolding the cognitive map: The role of hippocampal and extra-  
790 hippocampal substrates based on a systems analysis of spatial processing. *Neurobiology of*  
791 *Learning and Memory*, 147, 90–119. <https://doi.org/10.1016/j.nlm.2017.11.012>
- 792 Ito, H. T., Zhang, S.-J., Witter, M. P., Moser, E. I., & Moser, M.-B. (2015). A prefrontal–thalamo–  
793 hippocampal circuit for goal-directed spatial navigation. *Nature*, 522(7554), 50–55.  
794 <https://doi.org/10.1038/nature14396>
- 795 Jadhav, S. P., Kemere, C., German, P. W., & Frank, L. M. (2012). Awake hippocampal sharp-wave  
796 ripples support spatial memory. *Science*, 336(6087), 1454–1458.  
797 <https://doi.org/10.1126/science.1217230>
- 798 Jadhav, S. P. P., Rothschild, G., Roumis, D. K. K., & Frank, L. M. M. (2016). Coordinated Excitation and  
799 Inhibition of Prefrontal Ensembles during Awake Hippocampal Sharp-Wave Ripple Events. *Neuron*,  
800 90(1), 113–127. <https://doi.org/10.1016/j.neuron.2016.02.010>
- 801 Jankowski, M. M., Islam, M. N., Wright, N. F., Vann, S. D., Erichsen, J. T., Aggleton, J. P., & O'Mara, S.  
802 M. (2014). Nucleus reuniens of the thalamus contains head direction cells. *eLife*, 3(July2014), 1–10.  
803 <https://doi.org/10.7554/eLife.03075>
- 804 Jayachandran, M., Linley, S. B., Schlecht, M., Mahler, S. V, Vertes, R. P., & Allen, T. A. (2019). Prefrontal  
805 Pathways Provide Top-Down Control of Memory for Sequences of Events. *Cell Reports*, 28(3), 640–  
806 654.e6. <https://doi.org/10.1016/j.celrep.2019.06.053>
- 807 Jin, J., & Maren, S. (2015). Prefrontal-hippocampal interactions in memory and emotion. *Frontiers in*  
808 *Systems Neuroscience*, 9. <https://doi.org/10.3389/fnsys.2015.00170>
- 809 Jones, E G. (1998). Viewpoint: the core and matrix of thalamic organization. *Neuroscience*, 85(2), 331–  
810 345. [https://doi.org/10.1016/S0306-4522\(97\)00581-2](https://doi.org/10.1016/S0306-4522(97)00581-2)

- 811 Jones, E G, & Hendry, S. H. C. (1989). Differential calcium binding protein immunoreactivity distinguishes  
812 classes of relay neurons in monkey thalamic nuclei. *European Journal of Neuroscience*, 1(3), 222–  
813 246. <https://doi.org/10.1111/j.1460-9568.1989.tb00791.x>
- 814 Jones, Edward G. (2001). The thalamic matrix and thalamocortical synchrony. *Trends in Neurosciences*,  
815 24(10), 595–601. [https://doi.org/10.1016/S0166-2236\(00\)01922-6](https://doi.org/10.1016/S0166-2236(00)01922-6)
- 816 Kawano, J. (2001). Suprachiasmatic nucleus projections to the paraventricular thalamic nucleus of the rat.  
817 *Thalamus & Related Systems*, 1(3), 197–202. [https://doi.org/10.1016/S1472-9288\(01\)00019-X](https://doi.org/10.1016/S1472-9288(01)00019-X)
- 818 Kerr, K. M., Agster, K. L., Furtak, S. C., & Burwell, R. D. (2007). Functional neuroanatomy of the  
819 parahippocampal region: The lateral and medial entorhinal areas. *Hippocampus*, 17(9), 697–708.  
820 <https://doi.org/10.1002/hipo.20315>
- 821 Kirichenko, E. Y., Matsionis, A. E., Povilaitite, P. E., Akimenko, M. A., & Logvinov, A. K. (2017).  
822 Characteristics of the Structural Organization of the Ventral Posteromedial and Posterolateral Nuclei  
823 and the Reticular Nucleus of the Thalamus in Rats (an immunohistochemical study). *Neuroscience  
824 and Behavioral Physiology*, 47(6), 621–626. <https://doi.org/10.1007/s11055-017-0444-9>
- 825 Kosaka, T., Wu, J.-Y., & Benoit, R. (1988). GABAergic neurons containing somatostatin-like  
826 immunoreactivity in the rat hippocampus and dentate gyrus. *Experimental Brain Research*, 71(2).  
827 <https://doi.org/10.1007/BF00247498>
- 828 Lara-Vásquez, A., Espinosa, N., Durán, E., Stockle, M., & Fuentealba, P. (2016). Midline thalamic  
829 neurons are differentially engaged during hippocampus network oscillations. *Scientific Reports*, 6(1),  
830 29807. <https://doi.org/10.1038/srep29807>
- 831 Layfield, D. M., Patel, M., Hallock, H., & Griffin, A. L. (2015). Inactivation of the nucleus  
832 reuniens/rhomboid causes a delay-dependent impairment of spatial working memory. *Neurobiology  
833 of Learning and Memory*, 125, 163–167. <https://doi.org/10.1016/j.nlm.2015.09.007>
- 834 Li, S., & Kirouac, G. J. (2008). Projections from the paraventricular nucleus of the thalamus to the  
835 forebrain, with special emphasis on the extended amygdala. *The Journal of Comparative Neurology*,  
836 506(2), 263–287. <https://doi.org/10.1002/cne.21502>



- 837 Lisman, J. E., Pi, H. J., Zhang, Y., & Otmakhova, N. A. (2010). A Thalamo-Hippocampal-Ventral  
838 Tegmental Area Loop May Produce the Positive Feedback that Underlies the Psychotic Break in  
839 Schizophrenia. *Biological Psychiatry*, 68(1), 17–24. <https://doi.org/10.1016/j.biopsych.2010.04.007>
- 840 Loureiro, M., Cholvin, T., Lopez, J., Merienne, N., Latreche, A., Cosquer, B., Geiger, K., Kelche, C.,  
841 Cassel, J.-C., & de Vasconcelos, A. (2012). The Ventral Midline Thalamus (Reuniens and Rhomboid  
842 Nuclei) Contributes to the Persistence of Spatial Memory in Rats. *Journal of Neuroscience*, 32(29),  
843 9947–9959. <https://doi.org/10.1523/JNEUROSCI.0410-12.2012>
- 844 Majercikova, Z., Weering, H. van, Scsukova, S., Mikkelsen, J. D., & Kiss, A. (2012). A new approach of  
845 light microscopic immunohistochemical triple-staining: combination of Fos labeling with  
846 diaminobenzidine-nickel and neuropeptides labeled with Alexa488 and Alexa555 fluorescent dyes.  
847 *Endocrine Regulations*, 46(04), 217–223. [https://doi.org/10.4149/endo\\_2012\\_04\\_217](https://doi.org/10.4149/endo_2012_04_217)
- 848 Matzeu, A., Zamora-Martinez, E. R., & Martin-Fardon, R. (2014). The paraventricular nucleus of the  
849 thalamus is recruited by both natural rewards and drugs of abuse: recent evidence of a pivotal role  
850 for orexin/hypocretin signaling in this thalamic nucleus in drug-seeking behavior. *Frontiers in*  
851 *Behavioral Neuroscience*, 8. <https://doi.org/10.3389/fnbeh.2014.00117>
- 852 McGaugh, J. L., Bermudez-Rattoni, F., & Prado-Alcala, R. A. (2019). Plasticity in the central nervous  
853 system: Learning and memory. In *Plasticity in the Central Nervous System: Learning and Memory*.  
854 <https://doi.org/10.4324/9781315789279>
- 855 McKenna, J. T., & Vertes, R. P. (2004). Afferent projections to nucleus reuniens of the thalamus. *Journal*  
856 *of Comparative Neurology*, 480(2), 115–142. <https://doi.org/10.1002/cne.20342>
- 857 McQuin, C., Goodman, A., Chernyshev, V., Kametsky, L., Cimini, B. A., Karhohs, K. W., Doan, M., Ding,  
858 L., Rafelski, S. M., Thirstrup, D., Wiegnaebe, W., Singh, S., Becker, T., Caicedo, J. C., & Carpenter,  
859 A. E. (2018). CellProfiler 3.0: Next-generation image processing for biology. *PLOS Biology*, 16(7),  
860 e2005970. <https://doi.org/10.1371/journal.pbio.2005970>
- 861 Miettinen, R., Gulyás, A. I., Baimbridge, K. G., Jacobowitz, D. M., & Freund, T. F. (1992). Calretinin is  
862 present in non-pyramidal cells of the rat hippocampus—II. Co-existence with other calcium binding

- 863 proteins and gaba. *Neuroscience*, 48(1), 29–43. [https://doi.org/10.1016/0306-4522\(92\)90335-Y](https://doi.org/10.1016/0306-4522(92)90335-Y)
- 864 Moyer, J. R., Furtak, S. C., McGann, J. P., & Brown, T. H. (2011). Aging-related changes in calcium-
- 865 binding proteins in rat perirhinal cortex. *Neurobiology of Aging*, 32(9), 1693–1706.
- 866 <https://doi.org/10.1016/j.neurobiolaging.2009.10.001>
- 867 Nelson, A. J. D., Hindley, E. L., Haddon, J. E., Vann, S. D., & Aggleton, J. P. (2014). A novel role for the
- 868 rat retrosplenial cortex in cognitive control. *Learning & Memory*, 21(2), 90–97.
- 869 <https://doi.org/10.1101/lm.032136.113>
- 870 Nelson, M. R., & Chazin, W. J. (1998). Structures of EF-hand Ca<sup>2+</sup>-binding proteins: Diversity in the
- 871 organization, packing and response to Ca<sup>2+</sup> binding. *BioMetals*, 11(4), 297–318.
- 872 <https://doi.org/10.1023/A:1009253808876>
- 873 Penzo, M. A., Robert, V., Tucciarone, J., De Bundel, D., Wang, M., Van Aelst, L., Darvas, M., Parada, L.
- 874 F., Palmiter, R. D., He, M., Huang, Z. J., & Li, B. (2015). The paraventricular thalamus controls a
- 875 central amygdala fear circuit. *Nature*, 519(7544), 455–459. <https://doi.org/10.1038/nature13978>
- 876 Preston, A. R., & Eichenbaum, H. (2013). Review Interplay of Hippocampus and Prefrontal Cortex in
- 877 Memory. *CURBIO*, 23, R764--R773. <https://doi.org/10.1016/j.cub.2013.05.041>
- 878 Reynolds, G. P., Abdul-Monim, Z., Neill, J. C., & Zhang, Z.-J. (2004). Calcium binding protein markers of
- 879 GABA deficits in schizophrenia — post mortem studies and animal models. *Neurotoxicity Research*,
- 880 6(1), 57–61. <https://doi.org/10.1007/BF03033297>
- 881 Rogers, J. H., & Résibois, A. (1992). Calretinin and calbindin-D28k in rat brain: Patterns of partial co-
- 882 localization. *Neuroscience*, 51(4), 843–865. [https://doi.org/10.1016/0306-4522\(92\)90525-7](https://doi.org/10.1016/0306-4522(92)90525-7)
- 883 Roy, A., Svensson, F. P., Mazeh, A., & Kocsis, B. (2017). Prefrontal-hippocampal coupling by theta
- 884 rhythm and by 2–5 Hz oscillation in the delta band: The role of the nucleus reuniens of the thalamus.
- 885 *Brain Structure and Function*, 222(6), 2819–2830. <https://doi.org/10.1007/s00429-017-1374-6>
- 886 Schultheiss, N. W., Schlecht, M., Jayachandran, M., Brooks, D. R., McGlothan, J. L., Guilarte, T. R., &
- 887 Allen, T. A. (2020). Awake delta and theta-rhythmic hippocampal network modes during intermittent
- 888 locomotor behaviors in the rat. *Behavioral Neuroscience*, *undefined*(*undefined*), *undefined*.

- 889 <https://doi.org/10.1037/bne0000409>
- 890 Schwaller, B. (2014). Calretinin: from a “simple” Ca<sup>2+</sup> buffer to a multifunctional protein implicated in  
891 many biological processes. *Frontiers in Neuroanatomy*, 8. <https://doi.org/10.3389/fnana.2014.00003>
- 892 Sherman, S. M. (2017). Functioning of Circuits Connecting Thalamus and Cortex. In R. Terjung (Ed.),  
893 *Comprehensive Physiology* (pp. 713–739). John Wiley & Sons, Inc.  
894 <https://doi.org/10.1002/cphy.c160032>
- 895 Schindelin, J., Arganda-Carreras, I., Frise, E., Kaynig, V., Longair, M., Pietzsch, T., Preibisch, S., Rueden,  
896 C., Saalfeld, S., Schmid, B., Tinevez, J.Y., White, D. J., Hartenstein, V., Eliceiri, K., Tomancak, P., &  
897 Cardona, A. (2012). Fiji: An open-source platform for biological-image analysis. *Nature Methods*,  
898 9(7), 676–682. <https://doi.org/10.1038/nmeth.2019>
- 899 Skelin, I., Kilianski, S., & McNaughton, B. L. (2019). Hippocampal coupling with cortical and subcortical  
900 structures in the context of memory consolidation. *Neurobiology of Learning and Memory*, 160, 21–  
901 31. <https://doi.org/10.1016/j.nlm.2018.04.004>
- 902 Sloviter, R. S. (1989). Calcium-binding protein (calbindin-D28k) and parvalbumin immunocytochemistry:  
903 Localization in the rat hippocampus with specific reference to the selective vulnerability of  
904 hippocampal neurons to seizure activity. *The Journal of Comparative Neurology*, 280(2), 183–196.  
905 <https://doi.org/10.1002/cne.902800203>
- 906 Spellman, T., Rigotti, M., Ahmari, S. E., Fusi, S., Gogos, J. A., & Gordon, J. A. (2015). Hippocampal–  
907 prefrontal input supports spatial encoding in working memory. *Nature*, 522(7556), 309–314.  
908 <https://doi.org/10.1038/nature14445>
- 909 Su, H.-S., & Bentivoglio, M. (1990). Thalamic midline cell populations projecting to the nucleus  
910 accumbens, amygdala, and hippocampus in the rat. *The Journal of Comparative Neurology*, 297(4),  
911 582–593. <https://doi.org/10.1002/cne.902970410>
- 912 Swanson, L. W. (2018). Brain maps 4.0-Structure of the rat brain: An open access atlas with global  
913 nervous system nomenclature ontology and flatmaps. *Journal of Comparative Neurology*, 526(6),  
914 935–943. <https://doi.org/10.1002/cne.24381>

- 915 Todorova, R., & Zugaro, M. (2019). Isolated cortical computations during delta waves support memory  
916 consolidation. *Science*, 366(6463), 377–381. <https://doi.org/10.1126/science.aay0616>
- 917 Tollemar, V., Tudzarovski, N., Boberg, E., Törnqvist Andrén, A., Al-Adili, A., Le Blanc, K., Garming Legert,  
918 K., Bottai, M., Warfvinge, G., & Sugars, R. V. (2018). Quantitative chromogenic  
919 immunohistochemical image analysis in cellprofiler software: Quantitative chromogenic  
920 immunohistochemistry. *Cytometry Part A*, 93(10), 1051–1059. <https://doi.org/10.1002/cyto.a.23575>
- 921 Urbán, Z., Maglóczy, Z., & Freund, T. F. (2002). Calretinin-containing interneurons innervate both  
922 principal cells and interneurons in the CA1 region of the human hippocampus. *Acta Biologica  
923 Hungarica*, 53(1–2), 205–220. <https://doi.org/10.1556/ABiol.53.2002.1-2.19>
- 924 Van Brederode, J. F. M., Helliesen, M. K., & Hendrickson, A. E. (1991). Distribution of the calcium-binding  
925 proteins parvalbumin and calbindin-D28k in the sensorimotor cortex of the rat. *Neuroscience*, 44(1),  
926 157–171. [https://doi.org/10.1016/0306-4522\(91\)90258-P](https://doi.org/10.1016/0306-4522(91)90258-P)
- 927 Varela, C., Kumar, S., Yang, J. Y., & Wilson, M. A. (2014). Anatomical substrates for direct interactions  
928 between hippocampus, medial prefrontal cortex, and the thalamic nucleus reuniens. *Brain Structure  
929 and Function*, 219(3), 911–929. <https://doi.org/10.1007/s00429-013-0543-5>
- 930 Vertes, R. P., & Hoover, W. B. (2008). Projections of the paraventricular and paratenial nuclei of the  
931 dorsal midline thalamus in the rat. *The Journal of Comparative Neurology*, 508(2), 212–237.  
932 <https://doi.org/10.1002/cne.21679>
- 933 Vertes, R. P., Hoover, W. B., Do Valle, A. C., Sherman, A., & Rodriguez, J. J. (2006). Efferent projections  
934 of reuniens and rhomboid nuclei of the thalamus in the rat. *Journal of Comparative Neurology*,  
935 499(5). <https://doi.org/10.1002/cne.21135>
- 936 Vertes, R. P., Hoover, W. B., Szigeti-Buck, K., & Leranth, C. (2007). Nucleus reuniens of the midline  
937 thalamus: Link between the medial prefrontal cortex and the hippocampus. *Brain Research Bulletin*,  
938 71(6). <https://doi.org/10.1016/j.brainresbull.2006.12.002>
- 939 Vertes, R. P., Hoover, W. B., & Viana Di Prisco, G. (2004). Theta rhythm of the hippocampus: subcortical  
940 control and functional significance. In *Behavioral and cognitive neuroscience reviews* (Vol. 3, Issue

- 941 3, pp. 173–200). *Behav Cogn Neurosci Rev*. <https://doi.org/10.1177/1534582304273594>
- 942 Vertes, R. P., Linley, S. B., & Hoover, W. B. (2015). Limbic circuitry of the midline thalamus. In
- 943 *Neuroscience and Biobehavioral Reviews* (Vol. 54). <https://doi.org/10.1016/j.neubiorev.2015.01.014>
- 944 Viena, T. D., Linley, S. B., & Vertes, R. P. (2018). Inactivation of nucleus reuniens impairs spatial working
- 945 memory and behavioral flexibility in the rat. *Hippocampus*, 28(4). <https://doi.org/10.1002/hipo.22831>
- 946 Winsky, L., Montpied, P., Arai, R., Martin, B. M., & Jacobowitz, D. M. (1992). Calretinin distribution in the
- 947 thalamus of the rat: Immunohistochemical and in situ hybridization histochemical analyses.
- 948 *Neuroscience*, 50(1), 181–196. [https://doi.org/10.1016/0306-4522\(92\)90391-E](https://doi.org/10.1016/0306-4522(92)90391-E)
- 949 Witter, M. P., Doan, T. P., Jacobsen, B., Nilssen, E. S., & Ohara, S. (2017). Architecture of the Entorhinal
- 950 Cortex A Review of Entorhinal Anatomy in Rodents with Some Comparative Notes. *Frontiers in*
- 951 *Systems Neuroscience*, 11, 46. <https://doi.org/10.3389/fnsys.2017.00046>
- 952 Wouterlood, F. G., Canto, C. B., Aliane, V., Boekel, A. J., Grosche, J., Härtig, W., Beliën, J. A. M., &
- 953 Witter, M. P. (2007). Coexpression of vesicular glutamate transporters 1 and 2, glutamic acid
- 954 decarboxylase and calretinin in rat entorhinal cortex. *Brain Structure and Function*, 212(3–4), 303–
- 955 319. <https://doi.org/10.1007/s00429-007-0163-z>
- 956 Wouterlood, F. G., Grosche, J., & Härtig, W. (2001). Co-localization of calretinin and calbindin in distinct
- 957 cells in the hippocampal formation of the rat. *Brain Research*, 922(2), 310–314.
- 958 [https://doi.org/10.1016/S0006-8993\(01\)03220-6](https://doi.org/10.1016/S0006-8993(01)03220-6)
- 959 Xu, W., & Sudhof, T. C. (2013). A Neural Circuit for Memory Specificity and Generalization. *Science*,
- 960 339(6125), 1290–1295. <https://doi.org/10.1126/science.1229534>
- 961 Young, J. K., Wu, M., Manaye, K. F., Kc, P., Allard, J. S., Mack, S. O., & Haxhiu, M. A. (2005). Orexin
- 962 stimulates breathing via medullary and spinal pathways. *Journal of Applied Physiology*, 98(4), 1387–
- 963 1395. <https://doi.org/10.1152/jappphysiol.00914.2004>
- 964 Zimmer, D. B., Cornwall, E. H., Landar, A., & Song, W. (1995). The S100 protein family: History, function,
- 965 and expression. *Brain Research Bulletin*, 37(4), 417–429. [https://doi.org/10.1016/0361-](https://doi.org/10.1016/0361-9230(95)00040-2)
- 966 [9230\(95\)00040-2](https://doi.org/10.1016/0361-9230(95)00040-2)

967

968

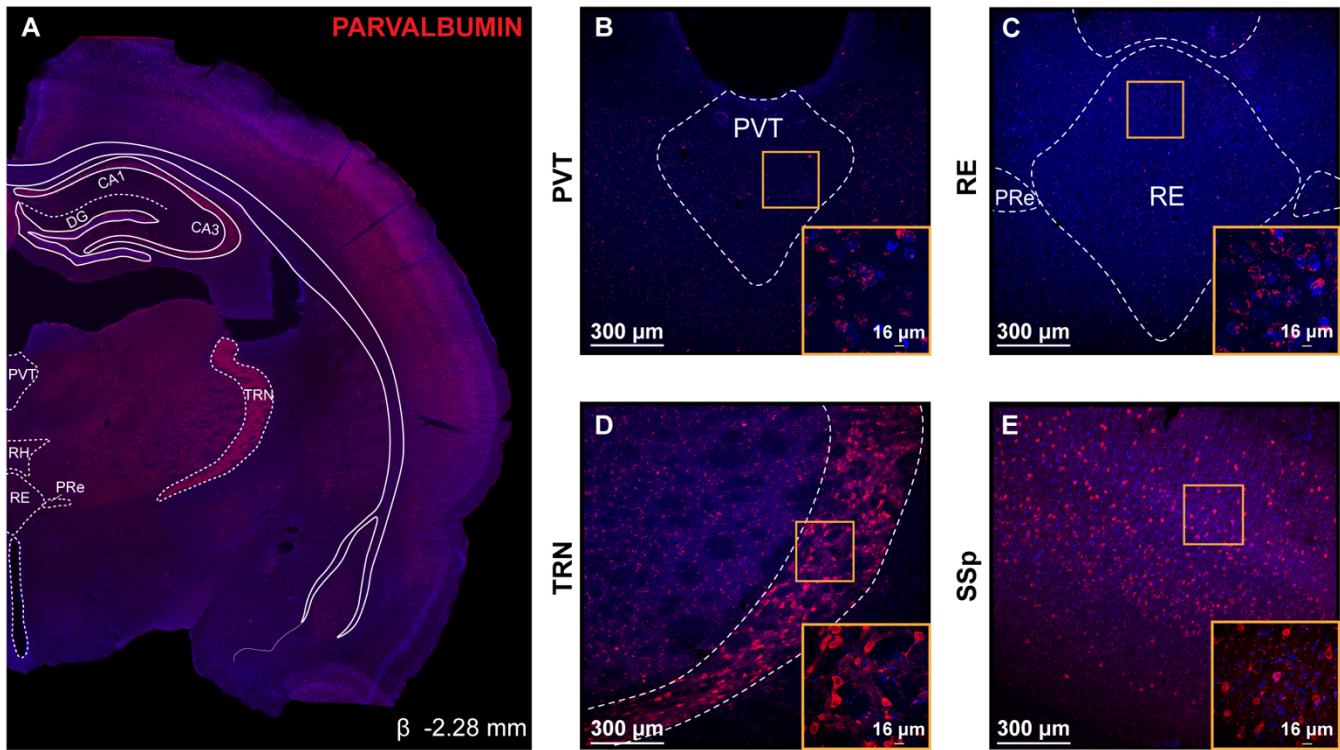

969  
970  
971  
972  
973  
974  
975  
976  
977  
978  
979  
980  
981  
982  
983  
984  
985  
986  
987  
988  
989

**Figure 1. Absence of parvalbumin (PV<sup>+</sup>) cell bodies in midline thalamus**

**A:** Representative coronal section ( $\beta$  -2.28mm) showing PV<sup>+</sup> cell body expression throughout several regions of the brain. PV<sup>+</sup> expression shown in red and DAPI in blue. Overlay shown adapted from Swanson (2018) to highlight thalamic structures.

**B-E:** Confocal images showing PV immunoreactivity in PVT (**B**), RE (**C**), TRN (**D**) and SSp (**E**). Neither PVT nor RE contain PV<sup>+</sup> cell bodies, however PV immunoreacted puncta was abundant near or between their cell bodies (**B-C** insets). Scale bar = 300μm. Inset scale bar= 16μm.

**D:** PV<sup>+</sup> cell bodies with a characteristic large immunonegative nuclei were seen in TRN (**D** inset).

**E:** PV<sup>+</sup> cell bodies were also observed in SSp cortex showing their distinct sparse but organized layer distribution (**E** inset). Gold squares represent regions of 60X magnification shown in inset.

Abbreviations:  $\beta$ , bregma; CA1, CA1 subfield of the hippocampus; CA3, CA3 subfield of the hippocampus; DAPI, 4',6-Diamidino-2-phenylindole dihydrochloride; DG, dentate gyrus; PV, parvalbumin; PVT, paraventricular; PRe, perireuniens; RE, nucleus reuniens; RH, rhomboid; SSp, primary somatosensory cortex; TRN, thalamic reticular nucleus.

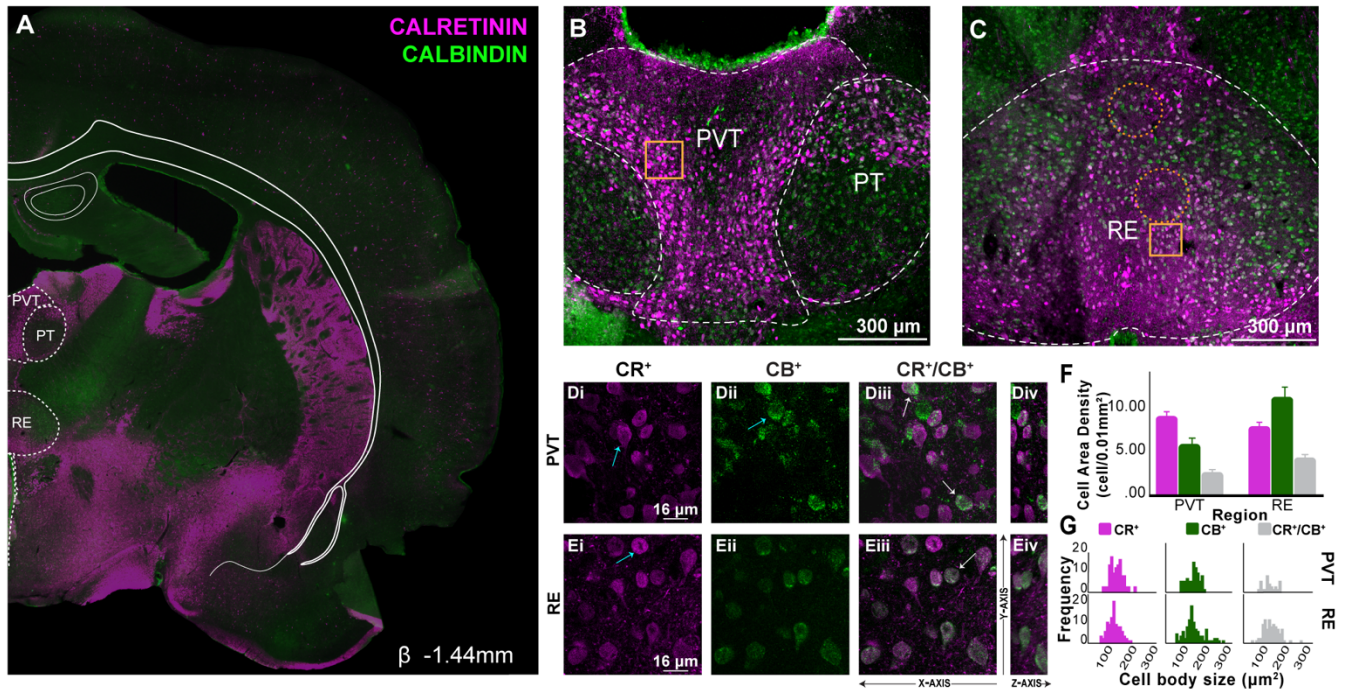

**Figure 2. CR and CB labeling in rostral midline thalamus**

**A:** Representative coronal section ( $\beta$  -1.44mm) showing immunofluorescent localization of CR<sup>+</sup> and CB<sup>+</sup> cell and fiber densities. Overlay shown adapted from Swanson (2018) to highlight midline thalamic structures. CR shown in magenta, CB in green.

**B:** Confocal image demonstrating distribution of CR<sup>+</sup> and CB<sup>+</sup> cells in PVT and PT. In PVT, CR was prominent in dorsolateral and ventromedial regions, and CB ventrally in PT. **C:** A similar but inversed distribution was observed in RE where CR<sup>+</sup> cells were prominent in ventrolateral and dorsomedial regions, while CB<sup>+</sup> cells were prominent laterally. Gold squares represent region of 60X magnification shown in inset. Orange dotted circles indicate regions where calcium binding protein cell expression is sparse or absent. Scale bar = 300 $\mu$ m.

**D:** Confocal images illustrating CR<sup>+</sup> (**D<sub>i</sub>**), CB<sup>+</sup> (**D<sub>ii</sub>**) and dual labeled CR<sup>+</sup>/CB<sup>+</sup> (**D<sub>iii</sub>**) immunoreacted cell bodies in PVT. Three distinct cell populations were identified: CR<sup>+</sup> only cells (**D<sub>i</sub>**, blue arrow), CB<sup>+</sup> only cells (**D<sub>ii</sub>**, blue arrow) and dual CR<sup>+</sup>/CB<sup>+</sup> cell bodies (**D<sub>iii</sub>**, white arrows). The Z-axis from these optical sections are shown to the right (**D<sub>iv</sub>**). **E:** Confocal images in RE (**E<sub>i</sub>**-**E<sub>iv</sub>**). Scale bar = 16 $\mu$ m.

**F:** Comparison of CR<sup>+</sup> and CB<sup>+</sup> cell area density in PVT and RE (cells/0.01mm<sup>2</sup>) in rostral levels. Error bars represent SEM.

**G:** Frequency distribution of CR<sup>+</sup>, CB<sup>+</sup> and CR<sup>+</sup>/CB<sup>+</sup> immunoreacted cell body size ( $\mu$ m<sup>2</sup>) in rostral PVT and RE.

Abbreviations:  $\beta$ , bregma; CB, calbindin; CR, calretinin; PVT, paraventricular; PT, paratenial; RE, nucleus reuniens, SEM, standard error of the mean.

990  
991  
992  
993  
994  
995  
996  
997  
998  
999  
000  
001  
002  
003  
004  
005  
006  
007  
008  
009  
010  
011  
012  
013  
014



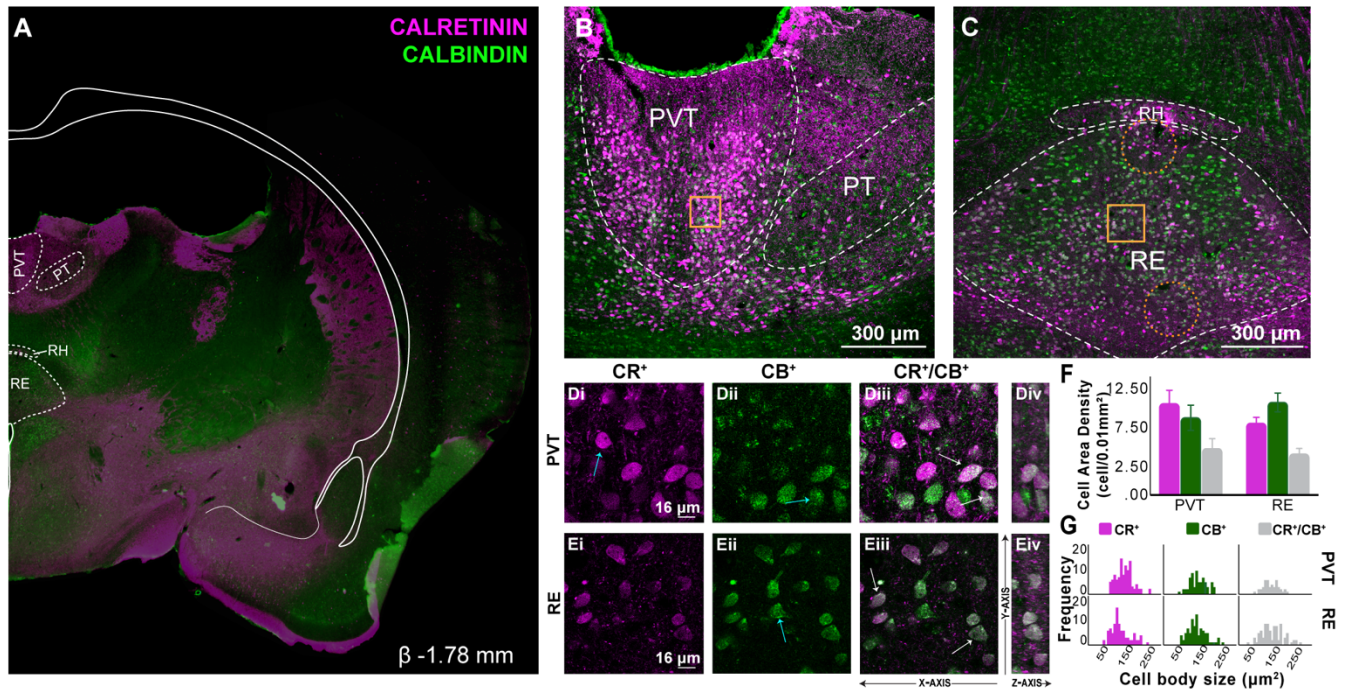

**Figure 3. CR and CB labeling in mid levels of midline thalamus**

**A:** Representative coronal section ( $\beta$  -1.78 mm) showing immunofluorescent localization of CR<sup>+</sup> and CB<sup>+</sup> cell and fiber densities in mid-levels of the rostro-caudal axis of the thalamus. Overlay shown adapted from Swanson (2018) to highlight midline thalamic structures. CR shown in magenta, CB in green. Fi, RSD and motor-sensory cortex layers missing from tissue section.

**B:** Confocal image demonstrating distribution of CR<sup>+</sup> and CB<sup>+</sup> in PVT and PT. Compared to rostral levels, PVT CR<sup>+</sup> and CB<sup>+</sup> cells re-distributed more ventral and laterally. CR<sup>+</sup> fibers were abundant in dorsal PVT and PT (below 3V).

**C:** In RE, a similar but inverse re-distribution was also observed, with CR<sup>+</sup> cells prominent ventral and laterally and CB<sup>+</sup> cells in dorsolateral regions. A zone of CR<sup>+</sup> fibers emerged ventromedially just above 3V. Gold squares represent regions of 60X magnification shown in inset. Orange dotted circles indicate regions in which there is sparse or no expression of calcium binding cells. Scale bar = 300 $\mu$ m.

**D:** Confocal images illustrating CR<sup>+</sup> (**D<sub>i</sub>**), CB<sup>+</sup> (**D<sub>ii</sub>**) and dual labeled CR<sup>+</sup>/CB<sup>+</sup> (**D<sub>iii</sub>**) immunoreacted cell bodies in PVT. At this level, the same three calcium binding cell types were visualized: CR<sup>+</sup> only cells (**D<sub>i</sub>**, blue arrow), CB<sup>+</sup> only cells (**D<sub>ii</sub>**, blue arrow) and dual CR<sup>+</sup>/CB<sup>+</sup> cell bodies (**D<sub>iii</sub>**, white arrows). The Z-axis from these optical sections are shown to the right (**D<sub>iv</sub>**).

**E:** Confocal images in RE (**E<sub>i</sub>**-**E<sub>iv</sub>**). Scale bar = 16 $\mu$ m.

**F:** Comparison of CR<sup>+</sup> and CB<sup>+</sup> cell area density in PVT and RE in mid-levels of midline thalamus (cells/0.01mm<sup>2</sup>).

**G:** Frequency distribution of CR<sup>+</sup>, CB<sup>+</sup> and CR<sup>+</sup>/CB<sup>+</sup> immunoreacted cell body size ( $\mu$ m<sup>2</sup>) in PVT and RE at mid-levels of the thalamus. Error bars represent SEM.

Abbreviations:  $\beta$ , bregma; CB, calbindin; CR, calretinin; PVT, paraventricular; PT, paratenial; RE, nucleus reuniens; RH, rhomboid; Fi, fimbria of the hippocampus, RSD, retrosplenial dysgranular cortex, SEM, standard error of the mean; 3V, third ventricle.

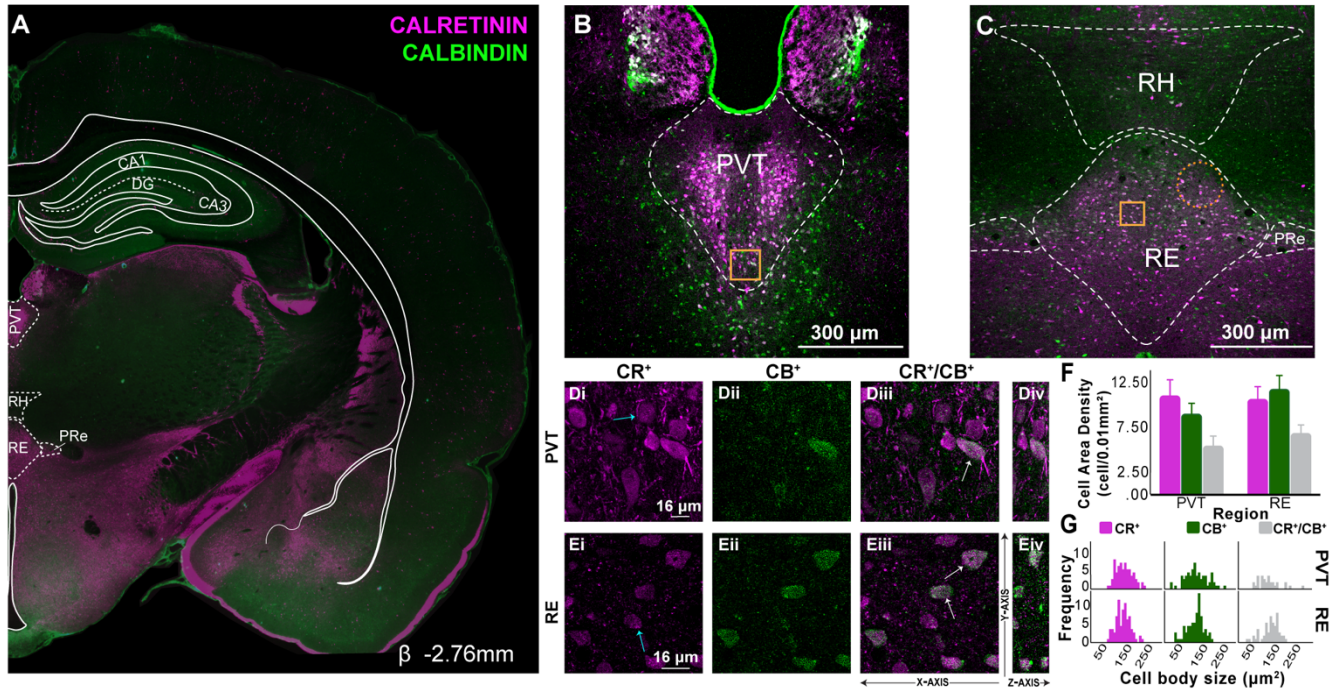

**Figure 4. CR and CB labeling in caudal midline thalamus**

**A:** Representative coronal section ( $\beta$  -2.76 mm) showing immunofluorescent localization of CR<sup>+</sup> and CB<sup>+</sup> cell and fiber densities in caudal midline thalamus. Overlay shown adapted from Swanson (2018) to highlight midline thalamic structures. CR shown in magenta, CB in green.

**B:** Confocal image demonstrating distribution of CR<sup>+</sup> and CB<sup>+</sup> cells in PVT and PT caudally. In PVT, CR<sup>+</sup> cells clustered mediolaterally and CB<sup>+</sup> cells were predominantly seen in PVT ventral borders. **C:** In RE, CB<sup>+</sup> cells were prominent in dorsal and lateral borders, while CR<sup>+</sup> cells were observed more mediolaterally, often overlapping with CB<sup>+</sup> cells. CR<sup>+</sup> fibers continued to be abundant ventrally (above 3V). Gold squares represent region of 60X magnification shown in inset. Orange dotted circles indicate regions in which there is sparse or no expression of calcium binding cells. Scale bar = 300 $\mu$ m.

**D:** Confocal images illustrating CR<sup>+</sup> (**D<sub>i</sub>**), CB<sup>+</sup> (**D<sub>ii</sub>**) and dual labeled CR<sup>+</sup>/CB<sup>+</sup> (**D<sub>iii</sub>**) immunoreacted cell bodies in PVT. As in previous levels, three cell types are visualized: CR<sup>+</sup> only cells (**D<sub>i</sub>**, blue arrow), CB<sup>+</sup> only cells (not shown) and dual CR<sup>+</sup>/CB<sup>+</sup> cell bodies (**D<sub>iii</sub>**, white arrows). The Z-axis from these optical sections are shown to the right (**D<sub>iv</sub>**).

**E:** Confocal images in RE (**E<sub>i</sub>-E<sub>iv</sub>**). Scale bar = 16 $\mu$ m.

**F:** Comparison of CR<sup>+</sup> and CB<sup>+</sup> cell area density in PVT and RE in caudal levels of the midline thalamus (cells/0.01mm<sup>2</sup>). Error bars represent SEM.

**G:** Frequency distribution of CR<sup>+</sup>, CB<sup>+</sup> and CR<sup>+</sup>/CB<sup>+</sup> immunoreacted cell body size ( $\mu$ m<sup>2</sup>) in caudal PVT and RE.

Abbreviations:  $\beta$ , bregma; CA1, CA1 subfield of the hippocampus; CA3, CA3 subfield of the hippocampus; CB, calbindin; CR, calretinin; DG, dentate gyrus; PVT, paraventricular; PRe, perireuniens; RE, nucleus reuniens, RH, rhomboid, SEM, standard error of the mean.

046  
047  
048  
049  
050  
051  
052  
053  
054  
055  
056  
057  
058  
059  
060  
061  
062  
063  
064  
065  
066  
067  
068  
069  
070  
071  
072  
073

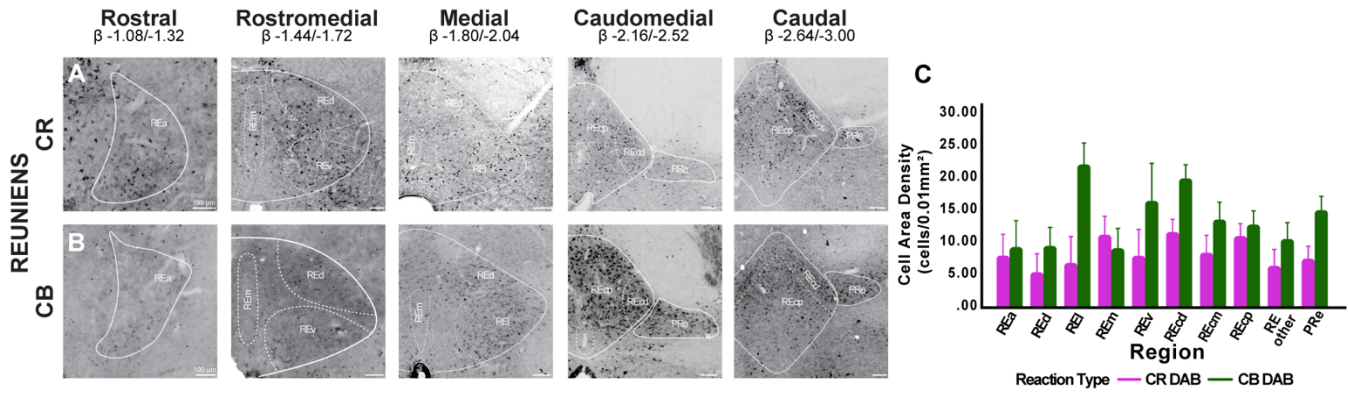

074

075

076

077

078

079

080

081

082

083

084

085

086

087

088

089

090

091

092

093

**Figure 5. Distribution of DAB CR<sup>+</sup> and DAB CB<sup>+</sup> cells is not the same across all RE internal subdivisions**

**A:** Brightfield images showing the distribution of DAB CR<sup>+</sup> cells in RE across the rostro-caudal axis of the thalamus. CR<sup>+</sup> cell area density varied depending on the subdivision of RE in which they were located.

**B:** Distribution of DAB CB<sup>+</sup> cells. When compared, CR<sup>+</sup> and CB<sup>+</sup> cell distribution in all RE's subregions and across the rostral to caudal levels did not appear to be the same. Overlay shown adapted from Swanson (2018) to highlight all RE internal subdivisions. Scale bar = 100µm.

**C:** Comparison of DAB CR<sup>+</sup> and DAB CB<sup>+</sup> cell area density (cells/0.01mm<sup>2</sup>) in all subdivisions of RE across the rostro-caudal axis. CB<sup>+</sup> cell densities were higher than CR<sup>+</sup> cell densities (except RE<sub>m</sub>). Additionally, RE<sub>l</sub>, RE<sub>v</sub> and RE<sub>cd</sub> subdivisions exhibited large CB<sup>+</sup> cell densities compared to other RE subregions. A moderate size effect was found for CB<sup>+</sup> cell area density across all levels and RE subdivisions (Hedges'  $d=0.32$ ).

Abbreviations: β, bregma; CB, calbindin; CR, calretinin; DAB, 3,3'-Diaminobenzidine; PRe, perireuniens, RE, nucleus reuniens of the thalamus, RE<sub>a</sub>, reuniens rostral division anterior part; RE<sub>d</sub>, reuniens rostral division dorsal part; RE<sub>l</sub>, reuniens rostral division lateral part; RE<sub>m</sub>, reuniens rostral division median part; RE<sub>v</sub>, reuniens rostral division ventral part; RE<sub>cm</sub>, reuniens caudal division median part; RE<sub>cd</sub>, reuniens caudal division dorsal part; RE<sub>cp</sub>, reuniens caudal division posterior part.

094

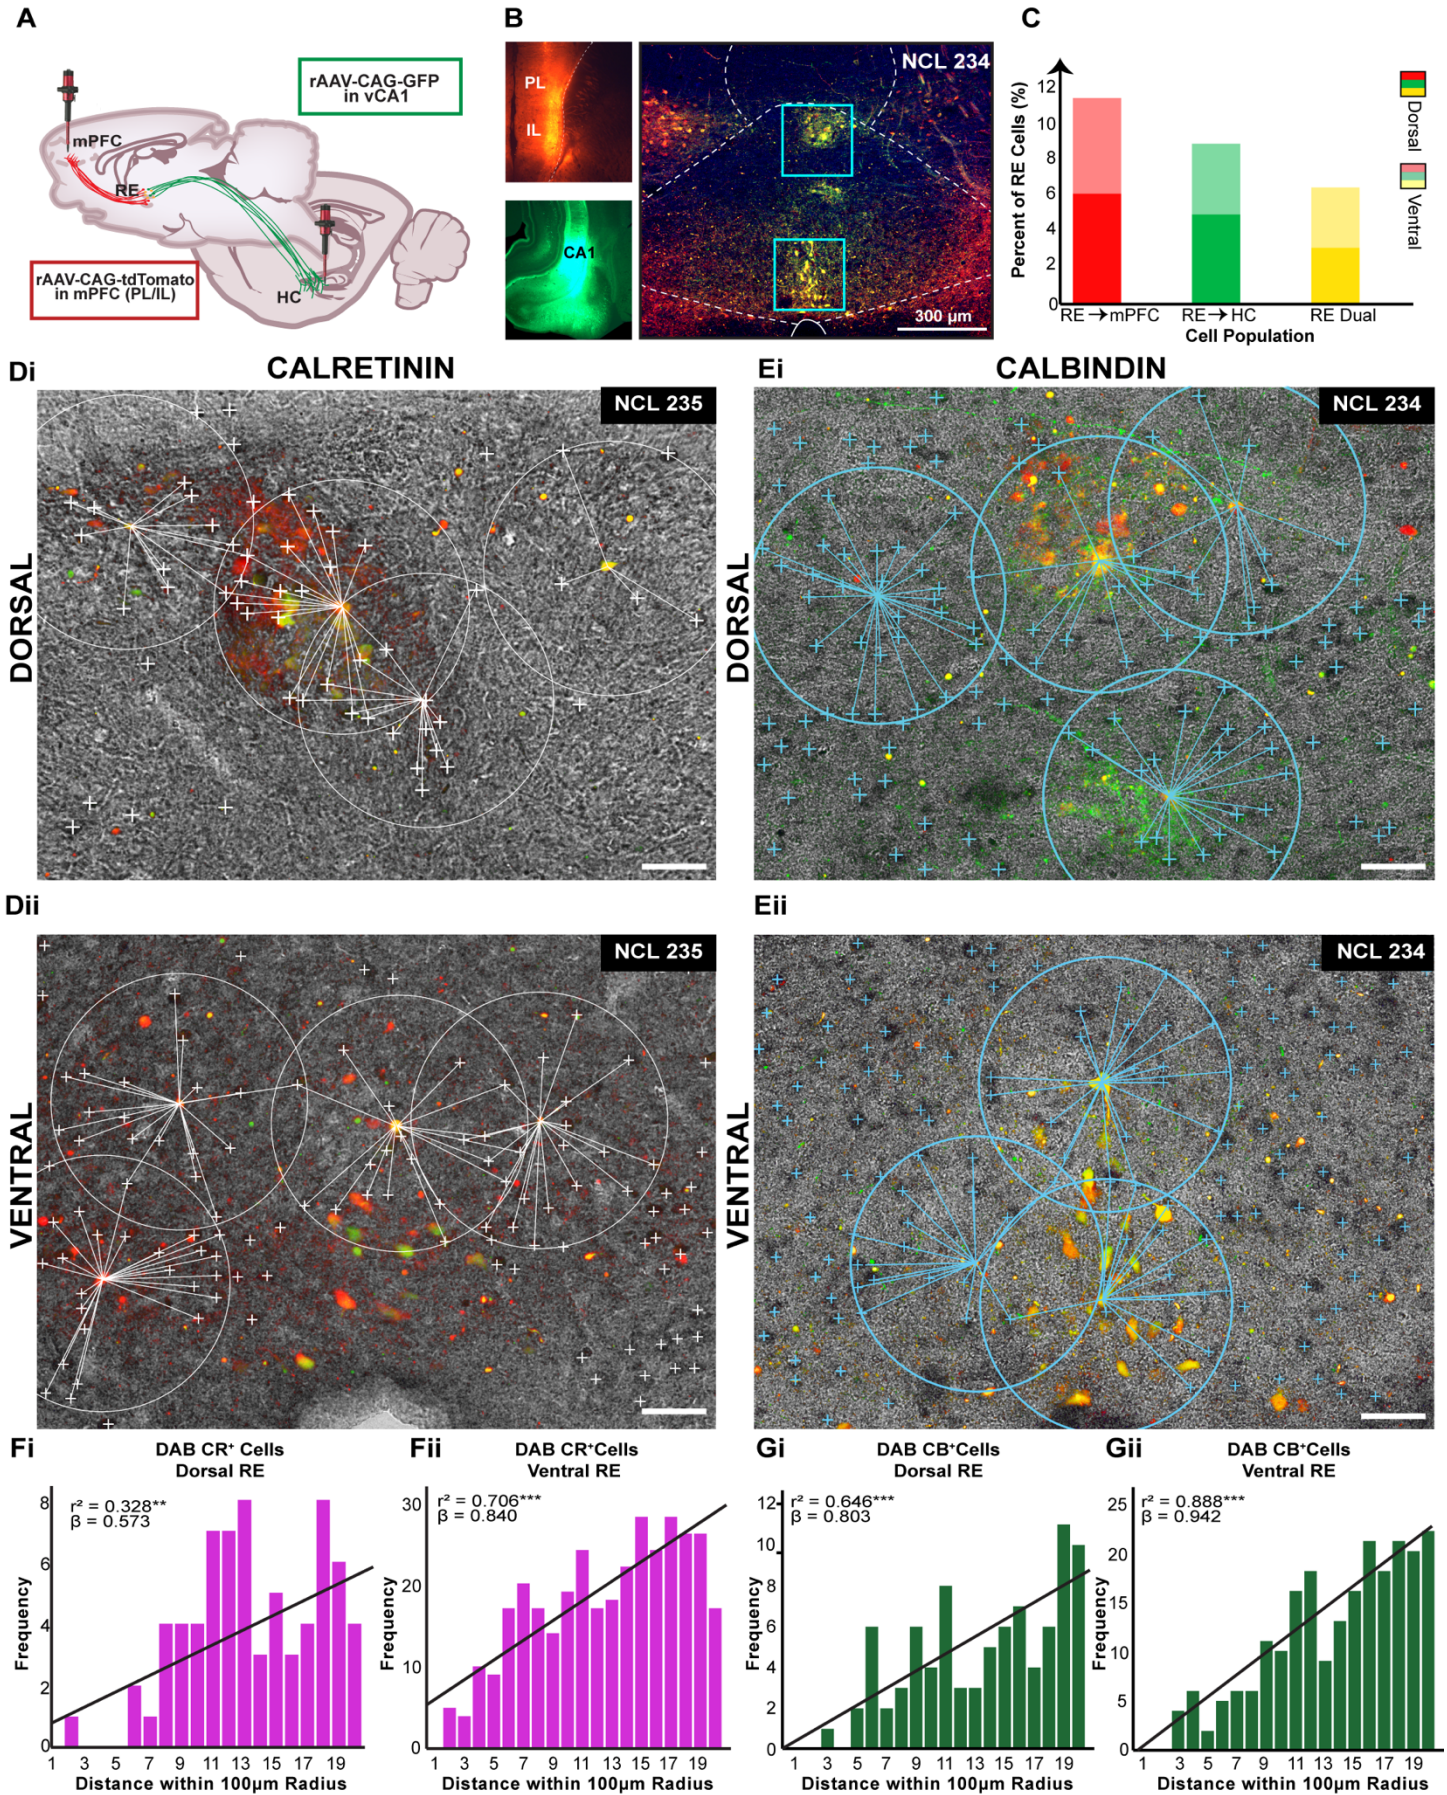

095 **Figure 6. Dual-site mPFC-HC RE projecting cells are not CB<sup>+</sup> or CR<sup>+</sup> cells**

096  
097 **A:** Experimental design. Paired bilateral injections of rAAV-CAG-tdTomato and rAAV-CAG-GFP delivered in mPFC  
098 and HC.  
099

100 **B:** Injections' spread was confined to PL/IL layer V/VII (top left) and vCA1 (bottom left). Retrogradely dual mPFC-HC  
101 projecting cells consistently clustered in dorsal and ventral aspects of RE in rostromedial levels (right). Blue squares  
102 represent regions in which clusters were found and further analyzed. Scale bar = 300µm.  
103

104 **C:** Percentage of retrogradely labeled RE to mPFC, REto vCA1 and dual mPFC-HC projecting neurons in RE dorsal  
105 and ventral regions of interest. All percentages are over total number of DAPI cells.  
106

107 **D-E:** Merged captures of immunofluorescent RE dual labeled cells (**D<sub>i</sub>-E<sub>ii</sub>**) and RE DAB CR<sup>+</sup> (**D<sub>i</sub>,D<sub>ii</sub>**) or DAB CB<sup>+</sup>  
108 (**E<sub>i</sub>,E<sub>ii</sub>**) cell bodies in dorsal and ventral RE. For process see Fig. S1. No dual labeling between dual mPFC-HC  
109 projecting cells and CR<sup>+</sup> or CB<sup>+</sup> cells in RE was observed. The relative distance between the center of RE dual  
110 labeled cells (yellow) and CR +DAB cells (marked with white '+' signs) and/or CB+ DAB cells (marked with cyan '+'  
111 signs) within a 100µm radius was measured using FIJI Image J. Scale bar = 50µm.  
112

113 **F-G:** Frequency distribution of DAB CR<sup>+</sup> and CB<sup>+</sup> cell counts in RE dorsal and ventral (**F<sub>i</sub>-G<sub>ii</sub>**) regions relative to  
114 radius distance (5µm bins) from RE dual (yellow) labeled cells. The number of DAB CR<sup>+</sup> and DAB CB<sup>+</sup> cells from RE  
115 dual labeled cells increased as a function of distance as shown by the linear regression line (black lines over  
116 histograms). Asterisks indicate significance: \*\*  $p < .01$ ; \*\*\* $p < .001$   
117

118 Abbreviations: rAAV, retrograde adeno-associated virus; CA1, CA1 subfield of the hippocampus; CAG, chicken  
119 beta-Actin promoter; CB, calbindin; CR, calretinin; DAB, 3,3'-Diaminobenzidine; DAPI, 4',6-Diamidino-2-phenylindole  
120 dihydrochloride; GFP, green fluorescent protein; HC, hippocampus; IL, infralimbic cortex; mPFC, medial prefrontal  
121 cortex; PL, prelimbic cortex; tdTomato, red fluorescent protein; vCA1, ventral CA1.

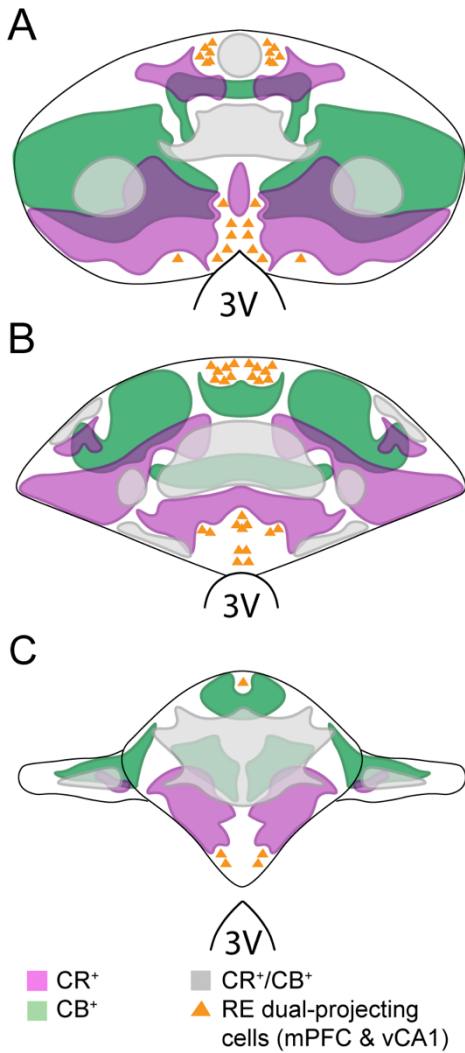

**Figure 7. Topographical localization of CR and CB cell zones relative to dual mPFC-vCA1 projecting cells within RE**

Schematic representation of the distribution of CR<sup>+</sup> and CB<sup>+</sup> cells in RE across (A) rostral, (B) medial, and (C) caudal levels. Colored areas represent zones where CR<sup>+</sup> (light magenta) and CB<sup>+</sup> (green) cells are concentrated. Intense magenta color represent regions in which CB and CR are in the same region, but do not overlap. Gray regions depict zones with dual labeled CR<sup>+</sup>/CB<sup>+</sup> cells are predominantly seen. Yellow triangles represent dual mPFC-HC projecting cells. Overlay shown adapted from Swanson (2018).

Abbreviations: CB, calbindin; CR, calretinin; mPFC, medial prefrontal cortex; RE, nucleus reuniens; vHC, ventral hippocampus; vCA1, ventral CA1; 3V, third ventricle.

132  
133
